# Supplementary material
Source: PubMed Central journal article supplement (PMC11018143)
Supplement: NIHMS1978675-supplement-1.pdf [file NIHMS1978675-supplement-1.pdf]

## Supplemental Material

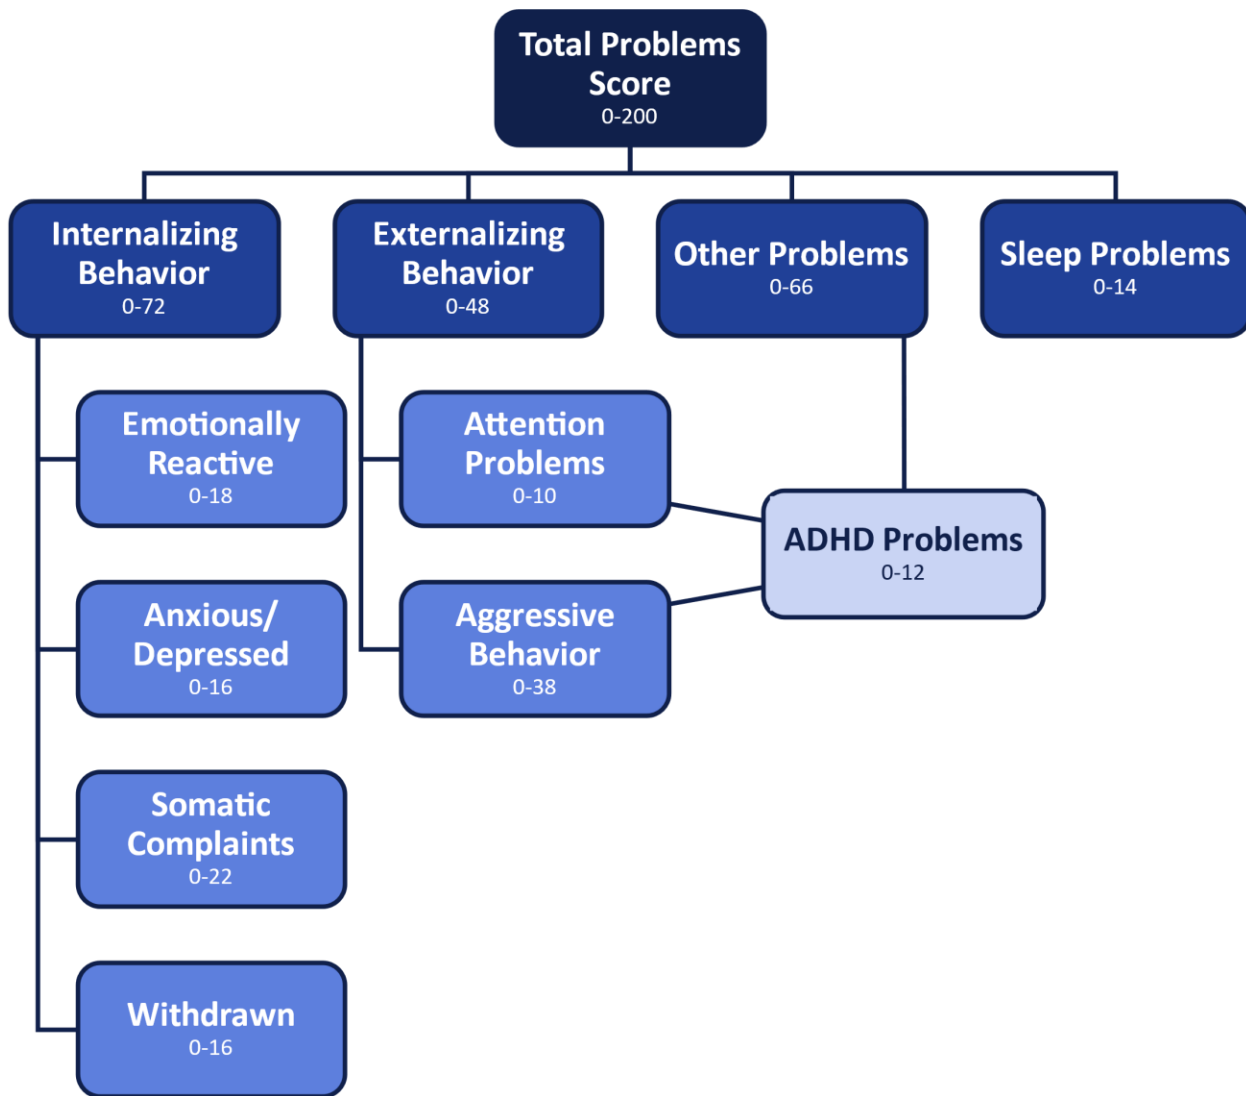

**Supplemental Figure S1.** Breakdown of scores on the Child Behavior Checklist – 1.5-5 years (CBCL). There are 100 items on the CBCL and each item on the CBCL has a possible score of 0-2. The Total Problems score is composed of the sum of all 100 items on the CBCL and has a possible range of 0-200. Sixty of the 100 items can be grouped to create the Internalizing Behavior (36 items) and Externalizing Behavior (24 items) composite scores. The 36 items included in the Internalizing Behavior composite score can be divided into four subscales: Emotionally Reactive (9 questions), Anxious/Depressed (8 questions), Somatic Complaints (11 questions), and Withdrawn (8 questions). The 24 items composing the Externalizing Behavior composite score can be divided into the Attention Problems (5 questions) and Aggressive Behavior (19 questions) subscales. Seven of the other 40 items can be summed to create the Sleep Problems subscale. The 33 remaining items are referred to as Other Problems but are not used as a score or to create any score other than the Total Problems score. The DSM-5-derived ADHD Problems score (6 items) is composed of one question from the Other Problems group, three questions from the Attention Problems subscale, and two questions from the Aggressive Behavior subscale.

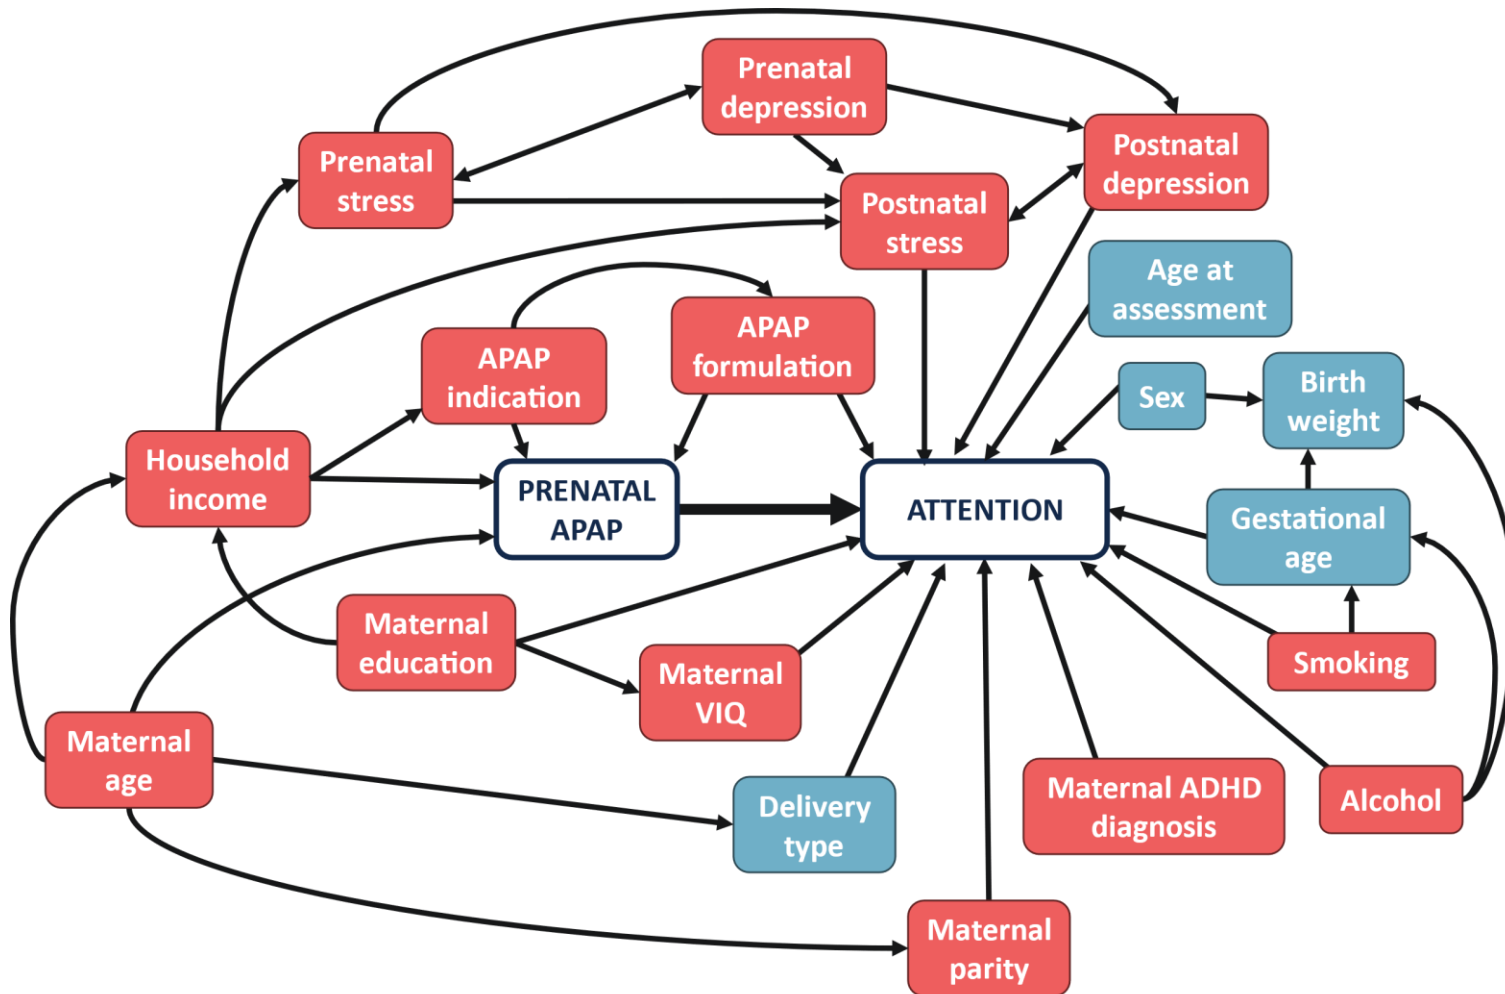

**Supplemental Figure S2.** Directed acyclic graph utilized in selecting covariates to consider for inclusion in models. APAP is the abbreviation for acetaminophen. For the purpose of simplicity, mean stress and depression across infancy and childhood as well as at each age at which language was assessed are all included in “Postnatal stress” and “Postnatal depression.” Blue boxes indicate child-related variables, and coral boxes indicate parent-related variables.

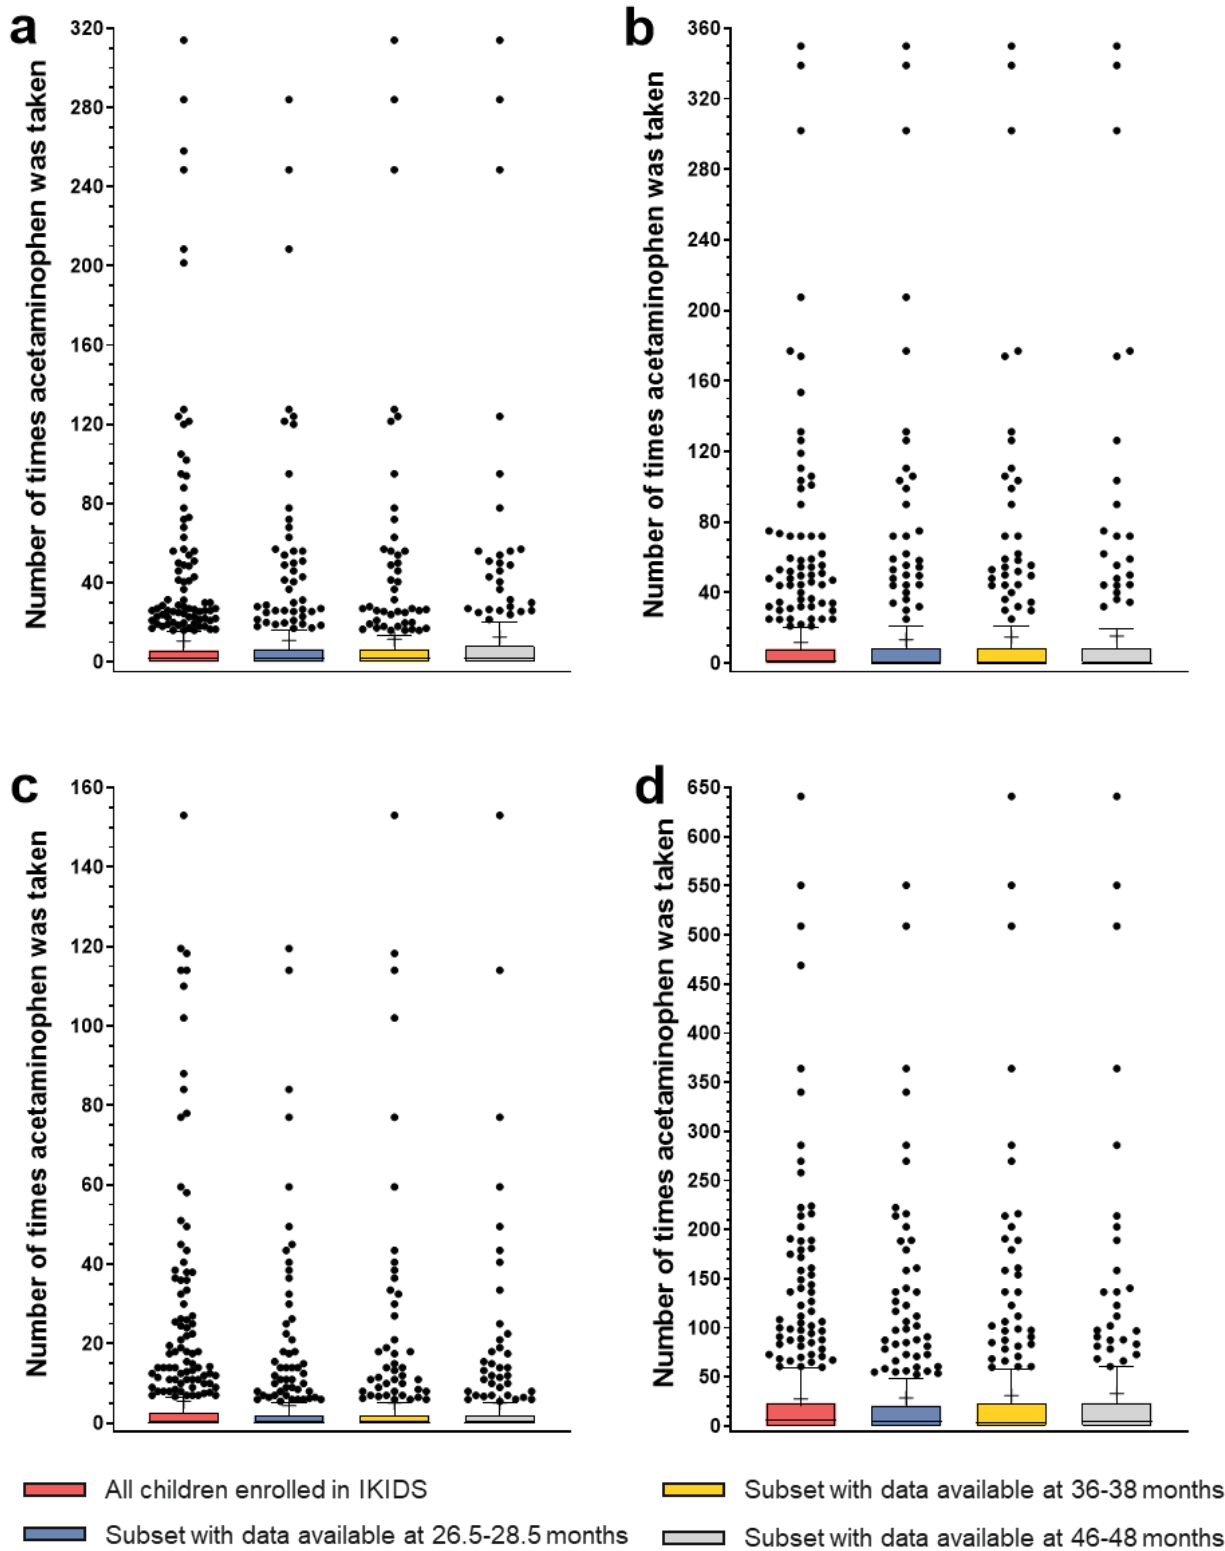

**Supplemental Figure S3.** Box and whisker plots showing the distribution, including mean (+), median, and outliers, of acetaminophen use during the (a) first trimester, (b) second trimester, (c) third trimester, and (d) entire pregnancy by the full sample of children enrolled in IKIDS at birth, and each subset of children with CBCL data available at 26.5-28.5 ( $n = 268$ ), 36-38 ( $n = 240$ ), and 46-48 months of age ( $n = 180$ ). Kruskal-Wallis Tests indicated there was no difference in use among the four groups for first trimester use ( $p = 0.99$ ), second trimester use ( $p = 0.89$ ), third trimester use ( $p = 0.96$ ), or use during the entire pregnancy ( $p = 0.97$ ). + mean

**Supplemental Table S1.** Our grouping of participant-reported acetaminophen formulation and indication for taking acetaminophen.

| Variable    | Categories                                   | List of Participant-Provided Information Included                                                                                                                                                                                                                                                                                                                                                                                                                                                                                                                                                                                                                                                                                                                                                                                                                                                                                                                                                                                                                                                                                                                                                                                           |
|-------------|----------------------------------------------|---------------------------------------------------------------------------------------------------------------------------------------------------------------------------------------------------------------------------------------------------------------------------------------------------------------------------------------------------------------------------------------------------------------------------------------------------------------------------------------------------------------------------------------------------------------------------------------------------------------------------------------------------------------------------------------------------------------------------------------------------------------------------------------------------------------------------------------------------------------------------------------------------------------------------------------------------------------------------------------------------------------------------------------------------------------------------------------------------------------------------------------------------------------------------------------------------------------------------------------------|
| Indication  | Pain                                         | aches, aches/headaches, aches/pains, aches/pains/headaches, back pain, back pain/headache, back/muscle pain, backache, backache/headache, bedtime aches, body aches, broken foot, broken toe, carpal tunnel, cramping, cramping/pain, exercise aches/pains, face pain, feet hurt, flank sciatic pain, general pain, general pain/headache, headache, headache/back pain/cramping, headache/backaches/cramping, headache/cramping, headache/cramping/back/sciatic pain, headache/cramps, headache/hip pain, headache/migraines, headache/minor aches, headache/muscle aches, headache/nerve pain, headache/pain, headache/post infusion pain, headache/various pains, hemorrhoid, hemorrhoid removal, joint aches, kidney stones, knee injury, knee pain, ligament pain, migraine, muscle aches, muscle pain, neck pain, neck/back/headache,pain, pain from feline scratches, pain/burns, pain/migraines, pressure, progesterone injections, pulled back muscle, rheumatoid arthritis, sciatic pain, sciatic pain/torn ab muscle, sciatic pain/torn muscle, sciatica, sharp pain in back, shin splints, sore throat, strep throat, tooth pain associated with root canal, tooth pain, various aches, various pains, wisdom tooth, wrist pain |
|             | Cold/flu/fever/illness/sinus                 | bronchial infection, bronchitis, cold, cold symptoms, cold/cough, cold/fever, cold/flu, cold/sinus, cough, fever, fever/cold, flu, flu-like symptoms, head cold, laryngitis, pneumonia, runny nose, sick, sinus, sinus cold, sinus infection, sinus pressure, sinus problems, stomach bug fever, stuffy headache                                                                                                                                                                                                                                                                                                                                                                                                                                                                                                                                                                                                                                                                                                                                                                                                                                                                                                                            |
|             | Other or multiple reasons                    | allergies, depression, gonorrhea, insomnia, pregnancy health, preterm labor, sleep, spotting, cold/migraines, cold/pain, general use, headache/flu, ligament pain/fevers, sleep aid/cramping, tooth/other, various reasons                                                                                                                                                                                                                                                                                                                                                                                                                                                                                                                                                                                                                                                                                                                                                                                                                                                                                                                                                                                                                  |
| Formulation | Acetaminophen alone                          | acetaminophen, Tylenol, Tylenol Extra Strength, Tylenol Kids                                                                                                                                                                                                                                                                                                                                                                                                                                                                                                                                                                                                                                                                                                                                                                                                                                                                                                                                                                                                                                                                                                                                                                                |
|             | Acetaminophen + other, multiple formulations | acetaminophen/butalbital/caffeine, acetaminophen/caffeine, butalbital/acetaminophen, dayquil, excedrin, excedrin migraine, midol, nyquil, tylenol cold, tylenol cold and flu, tylenol cold and sinus, tylenol cold daytime, tylenol cold nighttime, tylenol cold plus, tylenol pm, tylenol pm extra strength, tylenol severe cold and congestion, tylenol sinus, tylenol/caffeine, acetaminophen/codeine, esgic, fioricet, hydrocodone/acetaminophen, norco, tylenol/codeine, vicodin                                                                                                                                                                                                                                                                                                                                                                                                                                                                                                                                                                                                                                                                                                                                                       |

**Supplemental Table S2.** Results of Kruskal-Wallis Tests (p-values) for comparison of acetaminophen use during pregnancy among the full sample of children enrolled in IKIDS (n = 535) and each subset with CBCL data available (n = 268 at 26.5-28.5 months, n = 240 at 36-38 months, n = 180 at 46-48 months).

| <b>Exposure</b>  | <b>Times taken</b> | <b>Formulation</b> | <b>Indication</b> |
|------------------|--------------------|--------------------|-------------------|
| 1st Trimester    | 0.99               | 0.99               | 0.93              |
| 2nd Trimester    | 0.89               | 0.88               | 0.48              |
| 3rd Trimester    | 0.96               | 0.99               | 0.91              |
| Entire pregnancy | 0.97               | 0.99               | 0.98              |

**Supplemental Table S3.** Distributions of CBCL scores at 26.5-28.5, 36-38, and 46-48 months in IKIDS for all children and comparisons of male and female children.

| Outcome measures                          | n   | Possible Range of Scores | Mean ± SEM   | Median | Females |              | Males  |     | p-value <sup>†</sup> |            |              |
|-------------------------------------------|-----|--------------------------|--------------|--------|---------|--------------|--------|-----|----------------------|------------|--------------|
|                                           |     |                          |              |        | n       | Mean ± SEM   | Median | n   |                      | Mean ± SEM | Median       |
| <i>CBCL completed at 26.5-28.5 months</i> |     |                          |              |        |         |              |        |     |                      |            |              |
| Attention Problems                        | 292 | 0 - 10                   | 1.73 ± 0.10  | 1.00   | 155     | 1.72 ± 0.13  | 1.00   | 137 | 1.73 ± 0.15          | 1.00       | 0.94         |
| ADHD Problems                             | 295 | 0 - 12                   | 3.53 ± 0.14  | 3.00   | 157     | 3.36 ± 0.18  | 3.00   | 138 | 3.72 ± 0.21          | 4.00       | 0.19         |
| Internalizing Problems                    | 287 | 0 - 72                   | 4.14 ± 0.22  | 3.00   | 151     | 4.10 ± 0.30  | 3.00   | 136 | 4.18 ± 0.32          | 3.00       | 0.86         |
| Externalizing Problems                    | 288 | 0 - 48                   | 8.99 ± 0.37  | 8.00   | 153     | 8.71 ± 0.50  | 8.00   | 135 | 9.30 ± 0.56          | 8.00       | 0.43         |
| Total Problems Score                      | 278 | 0 - 200                  | 20.49 ± 0.83 | 18.00  | 148     | 19.86 ± 1.07 | 18.00  | 130 | 21.21 ± 1.28         | 18.00      | 0.42         |
| <i>CBCL completed at 36-38 months</i>     |     |                          |              |        |         |              |        |     |                      |            |              |
| Attention Problems                        | 258 | 0 - 10                   | 1.43 ± 0.10  | 1.00   | 129     | 1.21 ± 0.12  | 1.00   | 129 | 1.64 ± 0.15          | 1.00       | <b>0.02</b>  |
| ADHD Problems                             | 256 | 0 - 12                   | 2.92 ± 0.14  | 3.00   | 127     | 2.53 ± 0.18  | 2.00   | 129 | 3.31 ± 0.21          | 3.00       | <b>0.01</b>  |
| Internalizing Problems                    | 250 | 0 - 72                   | 4.53 ± 0.26  | 3.00   | 123     | 4.41 ± 0.38  | 3.00   | 127 | 4.65 ± 0.37          | 4.00       | 0.65         |
| Externalizing Problems                    | 248 | 0 - 48                   | 8.21 ± 0.41  | 7.00   | 122     | 7.30 ± 0.55  | 6.00   | 126 | 9.10 ± 0.61          | 8.00       | <b>0.03</b>  |
| Total Problems Score                      | 238 | 0 - 200                  | 19.92 ± 0.93 | 17.50  | 115     | 17.85 ± 1.29 | 14.00  | 123 | 21.85 ± 1.32         | 19.00      | <b>0.03</b>  |
| <i>CBCL completed at 46-48 months</i>     |     |                          |              |        |         |              |        |     |                      |            |              |
| Attention Problems                        | 193 | 0 - 10                   | 1.55 ± 0.11  | 1.00   | 94      | 1.21 ± 0.14  | 1.00   | 99  | 1.87 ± 0.17          | 2.00       | <b>0.003</b> |
| ADHD Problems                             | 195 | 0 - 12                   | 3.02 ± 0.17  | 3.00   | 97      | 2.49 ± 0.22  | 2.00   | 98  | 3.54 ± 0.25          | 3.00       | <b>0.002</b> |
| Internalizing Problems                    | 185 | 0 - 72                   | 5.06 ± 0.35  | 4.00   | 90      | 4.94 ± 0.50  | 4.00   | 95  | 5.18 ± 0.51          | 4.00       | 0.74         |
| Externalizing Problems                    | 187 | 0 - 48                   | 8.53 ± 0.48  | 8.00   | 91      | 7.04 ± 0.64  | 5.00   | 96  | 9.95 ± 0.70          | 9.00       | <b>0.003</b> |
| Total Problems Score                      | 176 | 0 - 200                  | 21.55 ± 1.17 | 19.00  | 85      | 19.91 ± 1.58 | 18.00  | 91  | 23.09 ± 1.71         | 21.00      | 0.18         |

SEM: Standard Error Mean

<sup>†</sup>p-values calculated using t-tests

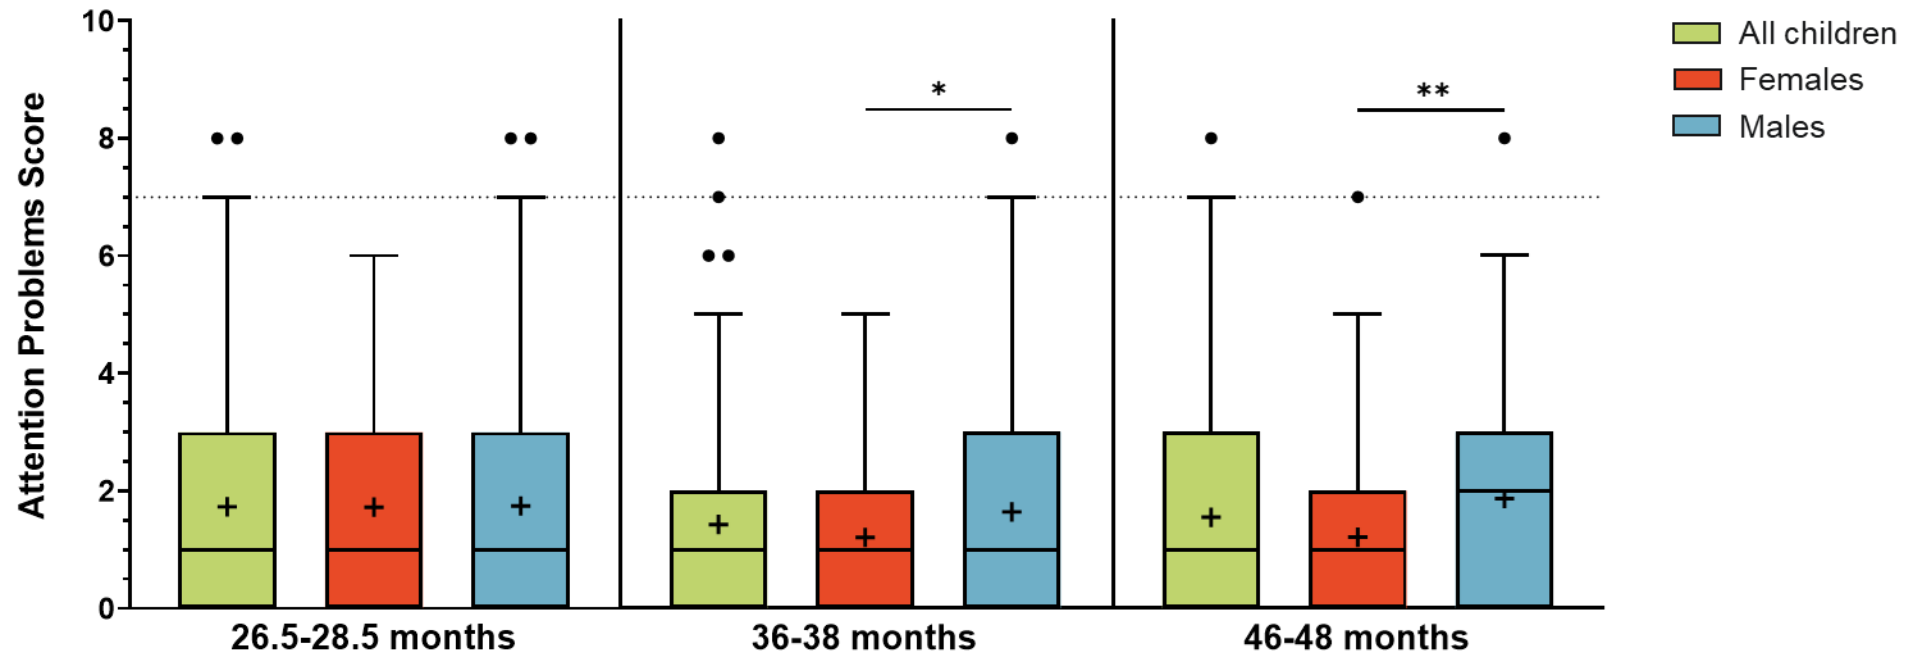

**Supplemental Figure S4.** Box and whisker plots depicting the range, interquartile range, mean (indicated by +) and median of Attention Problems scores on the CBCL at 26.5-28.5 (left panel), 36-38 (middle panel), and 46-48 months of age (right panel) in the IKIDS cohort. The dotted line indicates the cutoff above which scores are considered to be of clinical concern (7 for the Attention Problems score). At all three ages, Attention Problems scores ranged from 0-8 (the maximum score for Attention Problems is 10), and very few children had scores at or above the cutoff for clinical concern. The mean(standard deviation[SD]) Attention Problems score for all children in the sample was 1.73 (±0.10) at 26.5-28.5 months, and male and female children had similar Attention Problems scores at this age(females: 1.72±0.13, males 1.73±0.15,  $p = 0.94$ ). At 36-38 months of age, children had lower Attention Problems scores (1.43±0.10) compared to scores at 26.5-28.5 months ( $p = 0.08$ ), and although the difference was small, male children had higher scores (1.64±0.15) than female children (1.21±0.12,  $p = 0.02$ ). Children had Attention Problems scores at 46-48 months (1.55±0.11) that were between the mean score at 36-38 months ( $p = 0.59$ ) and 26.5-28.5 months ( $p = 0.58$ ). The difference in Attention Problems scores between male and female children was still small but larger than the difference at 36-38 months with male children again having higher scores (1.87±0.17) than female children (1.21±0.14) at 46-48 months ( $p = 0.003$ ).

+ mean

\* $p < 0.05$

\*\* $p < 0.01$

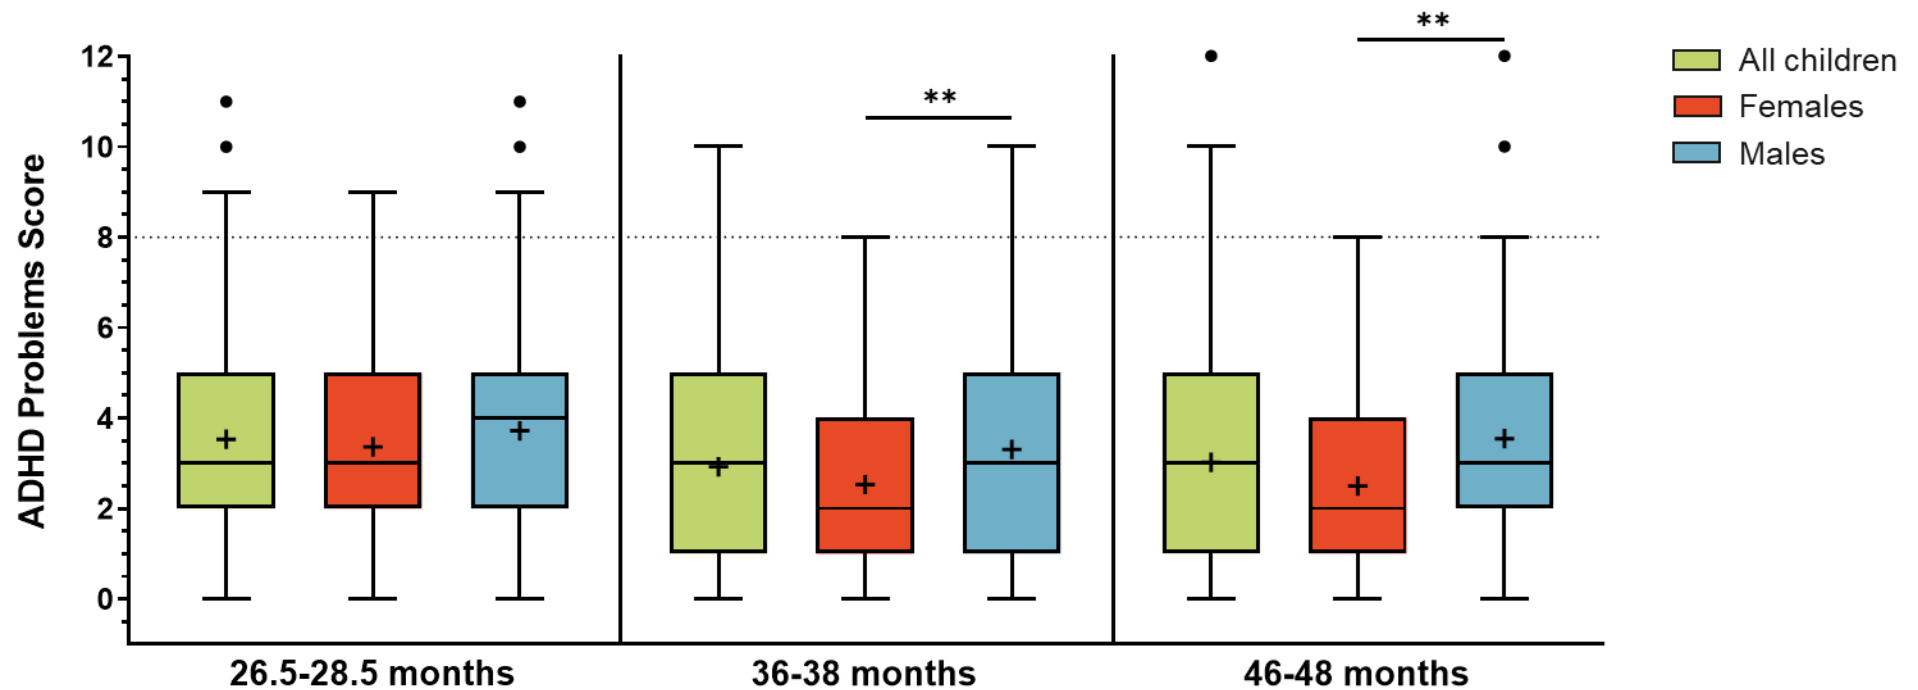

**Supplemental Figure S5.** Box and whisker plots depicting the range, interquartile range, mean (indicated by +) and median of ADHD Problems scores on the CBCL at 26.5-28.5 (left panel), 36-38 (center panel), and 46-48 months of age (right panel) in the IKIDS cohort. The dotted line indicates the cutoff above which scores are considered to be of clinical concern (8 for the ADHD Problems score), and few children had scores at or above the cutoff in IKIDS. ADHD Problems scores ranged from 0 to 11 at 26.5-28.5 months, 0 to 10 at 36-38 months, and 0 to 12 at 46-48 months with a maximum score of 12. At 26.5-28.5 months, the mean(standard deviation[SD]) ADHD Problems score for all children in the sample was 3.53 ( $\pm 0.14$ ), and while not statistically different, male children ( $3.72 \pm 0.21$ ) had higher scores compared to female children ( $3.36 \pm 0.18$ ,  $p = 0.19$ ). Children had lower mean ADHD Problems scores at 36-38 months ( $2.92 \pm 0.14$ ) compared to scores at 26.5-28.5 months ( $p = 0.08$ ), and male children had higher scores ( $3.31 \pm 0.21$ ) than female children ( $2.53 \pm 0.18$ ,  $p = 0.006$ ). Average scores for all children at 46-48 months were similar to scores at 36-38 months ( $3.02 \pm 0.17$ ;  $p = 0.59$ ), and the mean ADHD Problems score for male children ( $3.54 \pm 0.25$ ) was 1.05 points higher than for female children ( $2.49 \pm 0.22$ ,  $p = 0.002$ ).

+ mean

\*\* $p < 0.01$



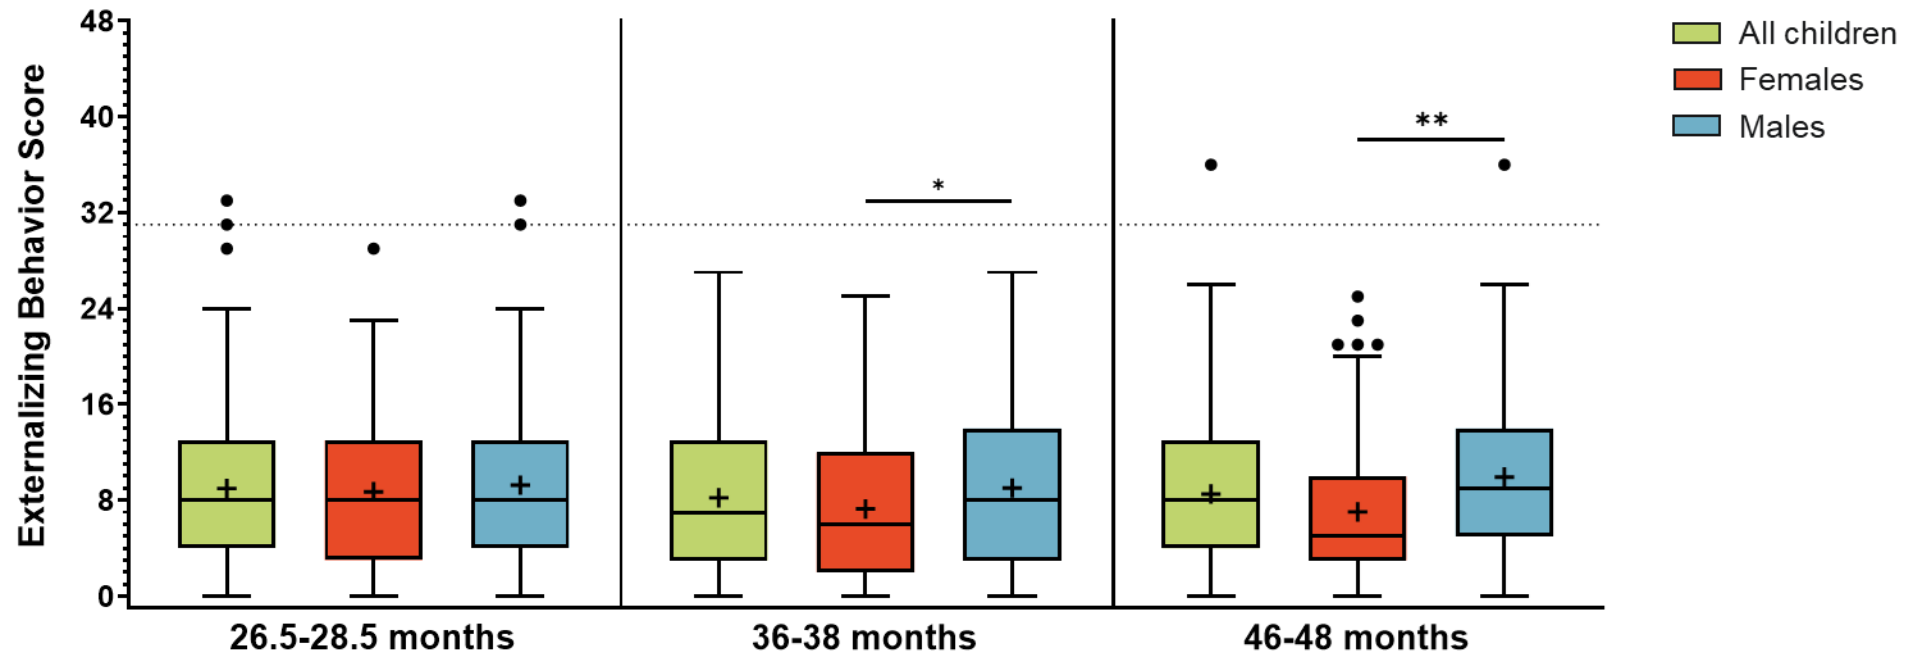

**Supplemental Figure S6.** Box and whisker plots depicting the range, interquartile range, mean (indicated by +) and median of Externalizing Behavior scores on the CBCL at 26.5-28.5 (left panel), 36-38 (center panel), and 46-48 months of age (right panel) in the IKIDS cohort. The dotted line indicates the cutoff above which scores are considered to be of clinical concern, which is 31 on the Externalizing Behavior score. Only two children had scores at or above the cutoff at 26.5-28.5 months, and only one child had an Externalizing Behavior score above 31 at 46-48 months. No children with data at 36-38 months had scores at or above the cutoff at 36-38 months. The maximum Externalizing Behavior score is 48, and scores ranged from 0 to 33 at 26.5-28.5 months, 0 to 27 at 36-38 months, and 0 to 36 at 46-48 months. The mean (standard deviation[SD]) Externalizing Behavior score for all children at 26.5-28.5 months was 8.99 ( $\pm 0.37$ ), and, while not statistically different, male children ( $9.30 \pm 0.56$ ) had 1.8 points higher than female children ( $8.71 \pm 0.50$ ,  $p = 0.43$ ). Mean Externalizing Behavior scores were lower at 36-38 months ( $8.21 \pm 0.41$ ) compared to scores at 26.5-28.5 months ( $p = 0.23$ ), but male children still had higher scores ( $9.10 \pm 0.61$ ) than female children ( $7.30 \pm 0.55$ ,  $p = 0.03$ ). Average scores for all children at 46-48 months ( $8.53 \pm 0.48$ ) were higher than scores at 36-38 months ( $p = 0.84$ ) but lower than scores at 26.5-28.5 months ( $p = 0.58$ ). At 46-48 months, male children had higher Externalizing Behavior scores ( $9.95 \pm 0.70$ ) was 2.91 points higher than for female children ( $7.04 \pm 0.64$ ,  $p = 0.003$ ).

+ mean  
 \* $p < 0.05$   
 \*\* $p < 0.01$

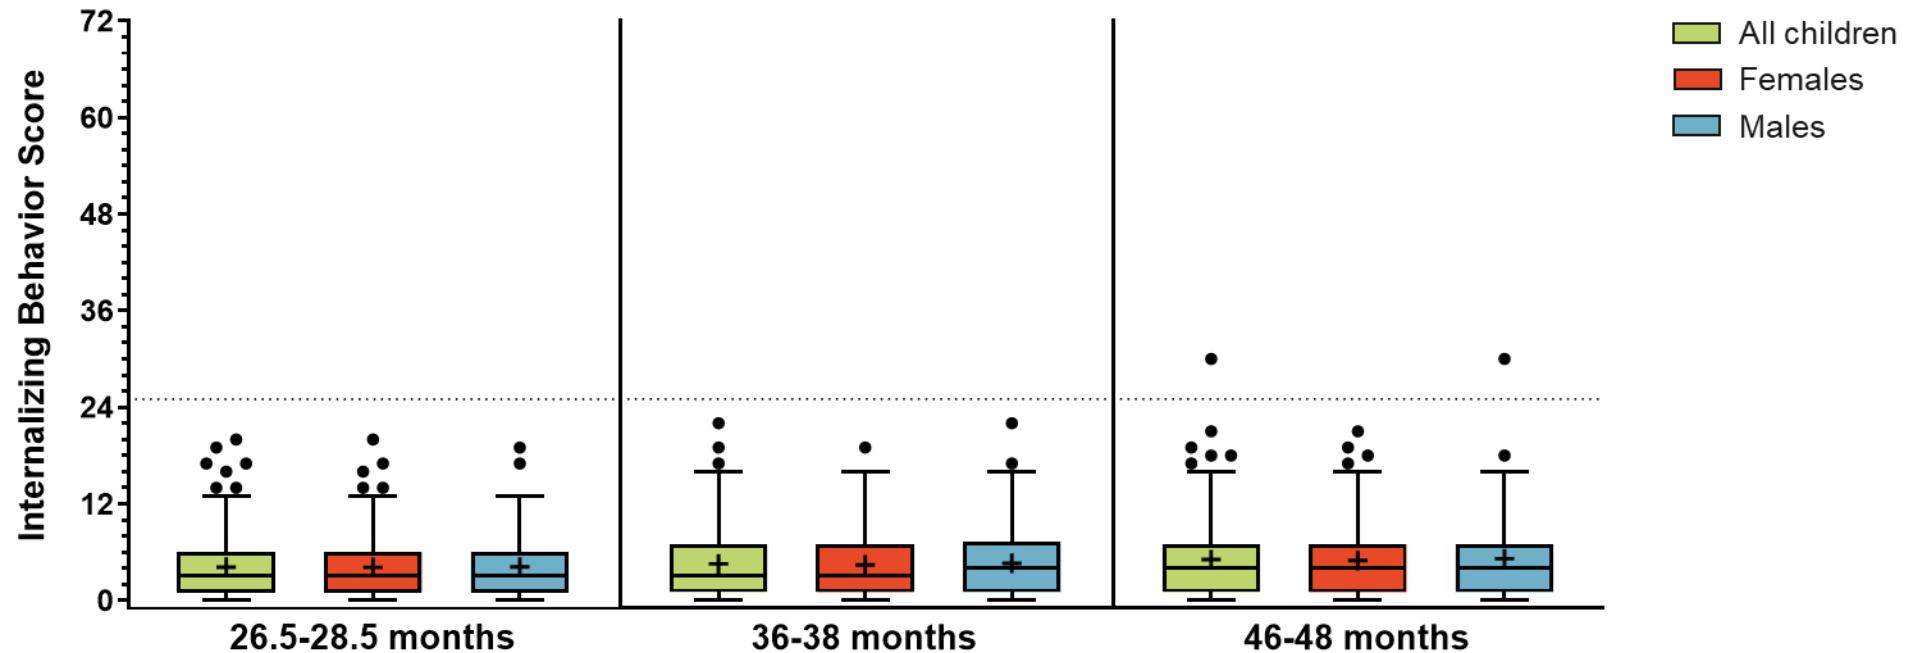

**Supplemental Figure S7.** Box and whisker plots depicting the range, interquartile range, mean (indicated by +) and median of Internalizing Behavior scores on the CBCL at 26.5-28.5 (left panel), 36-38 (center panel), and 46-48 months of age (right panel) in the IKIDS cohort. The dotted line indicates the cutoff above which scores are considered to be of clinical concern (25 for the Internalizing Behavior score), and only one child had a score above that in IKIDS at 46-48 months. Children in this cohort tended to have low scores on this outcome at all three ages, well below the maximum score of 72. Scores had a range of 0 to 20 at 26.5-28.5 months, 0 to 22 at 36-38 months, and 0 to 30 at 46-48 months. At 26.5-28.5 months, the mean(standard deviation[SD]) score for all children was 4.41 ( $\pm 0.22$ ), and male children (4.18 $\pm 0.32$ ) and female children (4.10 $\pm 0.30$ ) had similar scores ( $p = 0.86$ ). Children had slightly higher mean Externalizing Behavior scores at 36-38 months (4.53 $\pm 0.26$ ) compared to scores at 26.5-28.5 months ( $p = 0.77$ ), and male children had only slightly higher scores (4.65 $\pm 0.37$ ) than female children (4.41 $\pm 0.38$ ,  $p = 0.65$ ). Average scores for all children at 46-48 months (5.06 $\pm 0.35$ ) were higher than scores at 36-38 months ( $p = 0.57$ ), and male children (5.18 $\pm 0.51$ ) again had slightly higher scores than female children (4.94 $\pm 0.50$ ,  $p = 0.74$ ).

+ mean

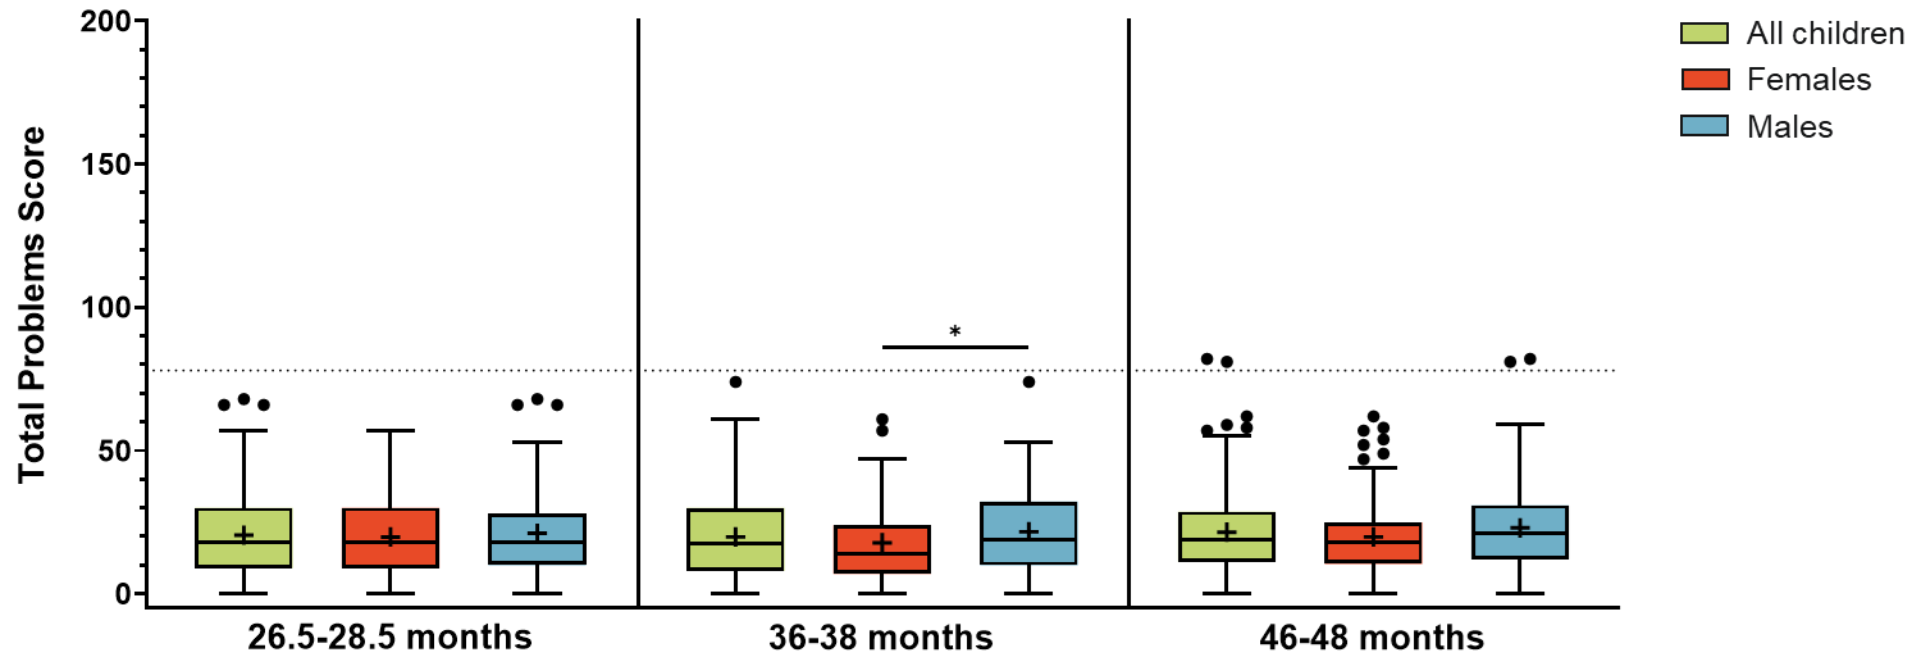

**Supplemental Figure S8.** Box and whisker plots depicting the range, interquartile range, mean (indicated by +) and median of Total Problems scores on the CBCL at 26.5-28.5 (left panel), 36-38 (center panel), and 46-48 months of age (right panel) in the IKIDS cohort. A score of 78 is the cutoff above which scores are considered to be of clinical concern (indicated by the dotted line), and only two children had scores above this cutoff at 46-48 months. Total Problems scores ranged from 0 to 68 at 26.5-28.5 months, 0 to 74 at 36-38 months, and 0 to 82 at 46-48 months with a maximum score of 200. At 26.5-28.5 months, the mean(standard deviation[SD]) score for all children in the sample was 20.49 ( $\pm 0.83$ ), male children ( $21.21 \pm 1.28$ ) had slightly higher scores compared to female children ( $19.86 \pm 1.07$ ,  $p = 0.42$ ). Total Problems scores at 36-38 months ( $19.92 \pm 0.93$ ) were lower than scores at 26.5-28.5 months ( $p = 0.77$ ), and male children had higher scores ( $21.85 \pm 1.32$ ) than female children ( $17.85 \pm 1.29$ ,  $p = 0.03$ ). Average scores for all children at 46-48 months ( $21.55 \pm 1.17$ ) were higher than scores at 26.5-28.5 months ( $p = 0.93$ ), and male children ( $23.09 \pm 1.71$ ) again had higher scores than female children ( $19.91 \pm 1.58$ ,  $p = 0.18$ ).

+ mean

\* $<0.05$

**Supplemental Table S4.** Pearson correlations for CBCL scores at 26.5-28.5, 36-38, and 46-48 months in IKIDS for all children with CBCL data available.

|                                           | CBCL completed at<br>26.5-28.5 months |      |      |      |      | CBCL completed at<br>36-38 months |      |      |      |      | CBCL completed at<br>46-48 months |      |      |      |
|-------------------------------------------|---------------------------------------|------|------|------|------|-----------------------------------|------|------|------|------|-----------------------------------|------|------|------|
|                                           | 1                                     | 2    | 3    | 4    | 5    | 6                                 | 7    | 8    | 9    | 10   | 11                                | 12   | 13   | 14   |
| <i>CBCL completed at 26.5-28.5 months</i> |                                       |      |      |      |      |                                   |      |      |      |      |                                   |      |      |      |
| 1. Attention Problems                     | --                                    | --   | --   | --   | --   | --                                | --   | --   | --   | --   | --                                | --   | --   | --   |
| 2. ADHD Problems                          | 0.80                                  | --   | --   | --   | --   | --                                | --   | --   | --   | --   | --                                | --   | --   | --   |
| 3. Internalizing Problems                 | 0.45                                  | 0.53 | --   | --   | --   | --                                | --   | --   | --   | --   | --                                | --   | --   | --   |
| 4. Externalizing Problems                 | 0.74                                  | 0.85 | 0.60 | --   | --   | --                                | --   | --   | --   | --   | --                                | --   | --   | --   |
| 5. Total Problems Score                   | 0.70                                  | 0.81 | 0.80 | 0.92 | --   | --                                | --   | --   | --   | --   | --                                | --   | --   | --   |
| <i>CBCL completed at 36-38 months</i>     |                                       |      |      |      |      |                                   |      |      |      |      |                                   |      |      |      |
| 6. Attention Problems                     | 0.65                                  | 0.64 | 0.35 | 0.59 | 0.56 | --                                | --   | --   | --   | --   | --                                | --   | --   | --   |
| 7. ADHD Problems                          | 0.55                                  | 0.65 | 0.41 | 0.63 | 0.61 | 0.84                              | --   | --   | --   | --   | --                                | --   | --   | --   |
| 8. Internalizing Problems                 | 0.34                                  | 0.40 | 0.60 | 0.49 | 0.57 | 0.41                              | 0.43 | --   | --   | --   | --                                | --   | --   | --   |
| 9. Externalizing Problems                 | 0.50                                  | 0.63 | 0.43 | 0.70 | 0.67 | 0.73                              | 0.82 | 0.60 | --   | --   | --                                | --   | --   | --   |
| 10. Total Problems Score                  | 0.53                                  | 0.62 | 0.54 | 0.69 | 0.71 | 0.69                              | 0.75 | 0.82 | 0.91 | --   | --                                | --   | --   | --   |
| <i>CBCL completed at 46-48 months</i>     |                                       |      |      |      |      |                                   |      |      |      |      |                                   |      |      |      |
| 11. Attention Problems                    | 0.56                                  | 0.55 | 0.23 | 0.46 | 0.46 | 0.62                              | 0.54 | 0.13 | 0.45 | 0.42 | --                                | --   | --   | --   |
| 12. ADHD Problems                         | 0.46                                  | 0.59 | 0.27 | 0.53 | 0.51 | 0.61                              | 0.66 | 0.22 | 0.58 | 0.53 | 0.83                              | --   | --   | --   |
| 13. Internalizing Problems                | 0.31                                  | 0.38 | 0.58 | 0.44 | 0.57 | 0.32                              | 0.36 | 0.50 | 0.43 | 0.49 | 0.41                              | 0.54 | --   | --   |
| 14. Externalizing Problems                | 0.42                                  | 0.55 | 0.32 | 0.61 | 0.58 | 0.59                              | 0.60 | 0.32 | 0.69 | 0.62 | 0.67                              | 0.84 | 0.65 | --   |
| 15. Total Problems Score                  | 0.46                                  | 0.56 | 0.44 | 0.61 | 0.64 | 0.54                              | 0.56 | 0.41 | 0.63 | 0.63 | 0.66                              | 0.80 | 0.84 | 0.92 |

**Supplemental Table S5.** Multivariable linear regression analyses of the relation ( $\beta$  estimate and 95% confidence interval) of prenatal acetaminophen exposure with scores on both composite scales and attention-related subscales.

| <i>Unadjusted<sup>1</sup></i> |                  | CBCL completed at<br>26.5-28.5 months | CBCL completed at<br>36-38 months | CBCL completed at<br>46-48 months |
|-------------------------------|------------------|---------------------------------------|-----------------------------------|-----------------------------------|
| Outcome                       | Exposure         | <i>n</i> = 268                        | <i>n</i> = 240                    | <i>n</i> = 180                    |
| Attention Problems            | 1st Trimester    | # 0.009 (-0.001, 0.018)               | # 0.008 (-0.0005, 0.016)          | 0.007 (-0.002, 0.015)             |
|                               | 2nd Trimester    | ** <b>0.011 (0.005, 0.016)</b>        | ** <b>0.010 (0.005, 0.015)</b>    | * <b>0.006 (0.001, 0.011)</b>     |
|                               | 3rd Trimester    | * <b>0.014 (0.0001, 0.028)</b>        | 0.008 (-0.004, 0.020)             | 0.012 (-0.003, 0.027)             |
|                               | Entire Pregnancy | ** <b>0.006 (0.002, 0.009)</b>        | ** <b>0.005 (0.002, 0.008)</b>    | * <b>0.004 (0.001, 0.007)</b>     |
| ADHD Problems                 | 1st Trimester    | 0.011 (-0.003, 0.024)                 | # 0.012 (-0.001, 0.024)           | -0.002 (-0.016, 0.012)            |
|                               | 2nd Trimester    | ** <b>0.013 (0.005, 0.022)</b>        | ** <b>0.016 (0.008, 0.023)</b>    | * <b>0.008 (0.001, 0.016)</b>     |
|                               | 3rd Trimester    | * <b>0.020 (0.0003, 0.040)</b>        | 0.013 (-0.005, 0.030)             | 0.010 (-0.013, 0.033)             |
|                               | Entire Pregnancy | ** <b>0.007 (0.002, 0.012)</b>        | ** <b>0.008 (0.003, 0.012)</b>    | 0.004 (-0.001, 0.009)             |
| Internalizing Problems        | 1st Trimester    | -0.002 (-0.024, 0.020)                | -0.009 (-0.032, 0.014)            | -0.019 (-0.047, 0.008)            |
|                               | 2nd Trimester    | 0.007 (-0.009, 0.023)                 | * <b>0.016 (0.002, 0.030)</b>     | # 0.017 (-0.0002, 0.033)          |
|                               | 3rd Trimester    | 0.001 (-0.035, 0.036)                 | # 0.028 (-0.005, 0.061)           | 0.009 (-0.041, 0.058)             |
|                               | Entire Pregnancy | 0.002 (-0.007, 0.011)                 | 0.006 (-0.002, 0.014)             | 0.004 (-0.007, 0.015)             |
| Externalizing Problems        | 1st Trimester    | 0.018 (-0.019, 0.054)                 | 0.014 (-0.023, 0.050)             | -0.003 (-0.041, 0.035)            |
|                               | 2nd Trimester    | ** <b>0.030 (0.008, 0.052)</b>        | ** <b>0.033 (0.011, 0.054)</b>    | * <b>0.027 (0.006, 0.049)</b>     |
|                               | 3rd Trimester    | * <b>0.055 (0.001, 0.109)</b>         | # 0.045 (-0.006, 0.096)           | 0.022 (-0.042, 0.086)             |
|                               | Entire Pregnancy | * <b>0.016 (0.003, 0.029)</b>         | * <b>0.016 (0.003, 0.029)</b>     | # 0.012 (-0.002, 0.027)           |
| Total Problems Score          | 1st Trimester    | 0.007 (-0.076, 0.090)                 | 0.022 (-0.057, 0.101)             | -0.005 (-0.097, 0.086)            |
|                               | 2nd Trimester    | # 0.051 (-0.009, 0.111)               | ** <b>0.086 (0.039, 0.133)</b>    | ** <b>0.076 (0.024, 0.129)</b>    |
|                               | 3rd Trimester    | 0.065 (-0.068, 0.198)                 | ** <b>0.146 (0.035, 0.257)</b>    | 0.042 (-0.114, 0.199)             |
|                               | Entire Pregnancy | 0.022 (-0.012, 0.056)                 | ** <b>0.043 (0.015, 0.071)</b>    | # 0.034 (-0.001, 0.069)           |

**Supplemental Table S5 (cont.).** Multivariable linear regression analyses of the relation ( $\beta$  estimate and 95% confidence interval) of prenatal acetaminophen exposure with scores on both composite scales and attention-related subscales.

| <i>Adjusted<sup>2</sup></i> |                  | CBCL completed at<br>26.5-28.5 months | CBCL completed at<br>36-38 months | CBCL completed at<br>46-48 months |
|-----------------------------|------------------|---------------------------------------|-----------------------------------|-----------------------------------|
| Outcome                     | Exposure         | <i>n</i> = 268                        | <i>n</i> = 240                    | <i>n</i> = 180                    |
| Attention Problems          | 1st Trimester    | 0.007 (-0.003, 0.017)                 | 0.005 (-0.003, 0.014)             | 0.003 (-0.007, 0.012)             |
|                             | 2nd Trimester    | ** <b>0.009 (0.003, 0.015)</b>        | ** <b>0.009 (0.004, 0.014)</b>    | 0.003 (-0.002, 0.008)             |
|                             | 3rd Trimester    | 0.009 (-0.006, 0.025)                 | 0.004 (-0.009, 0.017)             | 0.014 (-0.003, 0.031)             |
|                             | Entire Pregnancy | * <b>0.004 (0.001, 0.008)</b>         | ** <b>0.004 (0.001, 0.007)</b>    | 0.002 (-0.001, 0.006)             |
| ADHD Problems               | 1st Trimester    | 0.004 (-0.010, 0.018)                 | 0.004 (-0.009, 0.017)             | -0.007 (-0.022, 0.009)            |
|                             | 2nd Trimester    | * <b>0.010 (0.002, 0.019)</b>         | ** <b>0.013 (0.005, 0.021)</b>    | 0.007 (-0.002, 0.015)             |
|                             | 3rd Trimester    | 0.011 (-0.010, 0.033)                 | 0.003 (-0.017, 0.023)             | 0.008 (-0.018, 0.035)             |
|                             | Entire Pregnancy | # 0.004 (-0.001, 0.009)               | * <b>0.006 (0.001, 0.010)</b>     | 0.003 (-0.003, 0.008)             |
| Internalizing Problems      | 1st Trimester    | 0.005 (-0.019, 0.028)                 | # -0.021 (-0.045, 0.002)          | -0.024 (-0.054, 0.006)            |
|                             | 2nd Trimester    | 0.009 (-0.008, 0.025)                 | 0.008 (-0.007, 0.022)             | 0.014 (-0.004, 0.032)             |
|                             | 3rd Trimester    | -0.024 (-0.064, 0.016)                | 0.007 (-0.028, 0.042)             | -0.005 (-0.063, 0.053)            |
|                             | Entire Pregnancy | 0.001 (-0.008, 0.011)                 | 0.0003 (-0.008, 0.009)            | 0.002 (-0.010, 0.014)             |
| Externalizing Problems      | 1st Trimester    | 0.002 (-0.036, 0.040)                 | -0.0003 (-0.039, 0.038)           | -0.011 (-0.053, 0.031)            |
|                             | 2nd Trimester    | * <b>0.026 (0.004, 0.048)</b>         | * <b>0.025 (0.003, 0.047)</b>     | * <b>0.026 (0.003, 0.049)</b>     |
|                             | 3rd Trimester    | 0.023 (-0.036, 0.081)                 | 0.025 (-0.031, 0.081)             | 0.018 (-0.055, 0.092)             |
|                             | Entire Pregnancy | 0.009 (-0.004, 0.022)                 | 0.011 (-0.002, 0.024)             | 0.012 (-0.003, 0.028)             |
| Total Problems Score        | 1st Trimester    | 0.004 (-0.082, 0.091)                 | -0.017 (-0.098, 0.065)            | -0.029 (-0.129, 0.070)            |
|                             | 2nd Trimester    | # 0.052 (-0.009, 0.113)               | ** <b>0.066 (0.019, 0.112)</b>    | * <b>0.066 (0.011, 0.121)</b>     |
|                             | 3rd Trimester    | -0.035 (-0.183, 0.113)                | 0.091 (-0.028, 0.210)             | 0.018 (-0.163, 0.199)             |
|                             | Entire Pregnancy | 0.011 (-0.023, 0.046)                 | * <b>0.028 (0.0002, 0.056)</b>    | 0.028 (-0.009, 0.066)             |

<sup>1</sup>Unadjusted models were adjusted for child sex and age.

<sup>2</sup>All models were adjusted for child sex, age, and gestational age; maternal age, education, and parity; annual household income, reason for taking (indication), mean PSS score during pregnancy, mean EPDS score during pregnancy.

#  $p < 0.10$ , \* $p < 0.05$ , \*\* $p < 0.01$

**Supplemental Table S6.** Results of sensitivity analyses using multivariable linear regression analyses of the relation ( $\beta$  estimate and 95% confidence interval) of prenatal acetaminophen exposure and CBCL outcomes at 26.5-28.5, 36-38, and 46-48 months.<sup>1</sup>

| Sensitivity Analysis                             | Outcome                | Exposure         | CBCL completed at              | CBCL completed at              | CBCL completed at             |
|--------------------------------------------------|------------------------|------------------|--------------------------------|--------------------------------|-------------------------------|
|                                                  |                        |                  | 26.5-28.5 months               | 36-38 months                   | 46-48 months                  |
|                                                  |                        |                  | <i>n</i> = 268                 | <i>n</i> = 240                 | <i>n</i> = 180                |
| Including alcohol use during pregnancy in models | Attention Problems     | 1st Trimester    | 0.006 (-0.004, 0.016)          | 0.005 (-0.004, 0.014)          | 0.003 (-0.007, 0.012)         |
|                                                  |                        | 2nd Trimester    | ** <b>0.010 (0.004, 0.015)</b> | ** <b>0.009 (0.004, 0.014)</b> | 0.003 (-0.002, 0.009)         |
|                                                  |                        | 3rd Trimester    | 0.010 (-0.005, 0.026)          | 0.004 (-0.009, 0.017)          | # 0.014 (-0.003, 0.031)       |
|                                                  |                        | Entire Pregnancy | * <b>0.004 (0.001, 0.008)</b>  | ** <b>0.004 (0.001, 0.007)</b> | * <b>0.012 (0.002, 0.023)</b> |
|                                                  | ADHD Problems          | 1st Trimester    | 0.004 (-0.010, 0.018)          | 0.004 (-0.009, 0.017)          | -0.007 (-0.022, 0.009)        |
|                                                  |                        | 2nd Trimester    | * <b>0.011 (0.002, 0.019)</b>  | ** <b>0.013 (0.005, 0.021)</b> | 0.007 (-0.001, 0.015)         |
|                                                  |                        | 3rd Trimester    | 0.013 (-0.009, 0.034)          | 0.004 (-0.016, 0.023)          | 0.009 (-0.017, 0.036)         |
|                                                  |                        | Entire Pregnancy | # 0.004 (-0.001, 0.009)        | * <b>0.006 (0.001, 0.010)</b>  | 0.003 (-0.003, 0.008)         |
|                                                  | Internalizing Problems | 1st Trimester    | 0.004 (-0.020, 0.027)          | # -0.022 (-0.045, 0.001)       | # -0.025 (-0.055, 0.005)      |
|                                                  |                        | 2nd Trimester    | 0.007 (-0.009, 0.024)          | 0.007 (-0.007, 0.022)          | 0.014 (-0.004, 0.031)         |
|                                                  |                        | 3rd Trimester    | -0.023 (-0.064, 0.017)         | 0.007 (-0.028, 0.043)          | -0.003 (-0.061, 0.054)        |
|                                                  |                        | Entire Pregnancy | 0.001 (-0.009, 0.010)          | 0.0001 (-0.008, 0.009)         | 0.002 (-0.010, 0.013)         |
|                                                  | Externalizing Problems | 1st Trimester    | 0.001 (-0.037, 0.039)          | -0.003 (-0.041, 0.036)         | -0.011 (-0.053, 0.031)        |
|                                                  |                        | 2nd Trimester    | * <b>0.026 (0.004, 0.048)</b>  | * <b>0.025 (0.003, 0.047)</b>  | * <b>0.026 (0.003, 0.049)</b> |
|                                                  |                        | 3rd Trimester    | 0.027 (-0.031, 0.085)          | 0.026 (-0.030, 0.082)          | 0.019 (-0.054, 0.093)         |
|                                                  |                        | Entire Pregnancy | 0.009 (-0.004, 0.022)          | 0.011 (-0.003, 0.024)          | 0.012 (-0.003, 0.028)         |
|                                                  | Total Problems Score   | 1st Trimester    | 0.001 (-0.086, 0.088)          | -0.021 (-0.102, 0.061)         | -0.030 (-0.129, 0.069)        |
|                                                  |                        | 2nd Trimester    | 0.049 (-0.012, 0.111)          | ** <b>0.065 (0.018, 0.112)</b> | * <b>0.066 (0.012, 0.120)</b> |
|                                                  |                        | 3rd Trimester    | -0.025 (-0.174, 0.124)         | 0.093 (-0.026, 0.212)          | 0.025 (-0.155, 0.206)         |
|                                                  |                        | Entire Pregnancy | 0.011 (-0.024, 0.046)          | # 0.028 (-0.0005, 0.056)       | 0.028 (-0.009, 0.065)         |

**Supplemental Table S6 (cont.).** Results of sensitivity analyses using multivariable linear regression analyses of the relation ( $\beta$  estimate and 95% confidence interval) of prenatal acetaminophen exposure and CBCL outcomes at 26.5-28.5, 36-38, and 46-48 months.<sup>1</sup>

| Sensitivity Analysis                   | Outcome                | Exposure         | CBCL completed at              | CBCL completed at              | CBCL completed at             |
|----------------------------------------|------------------------|------------------|--------------------------------|--------------------------------|-------------------------------|
|                                        |                        |                  | 26.5-28.5 months               | 36-38 months                   | 46-48 months                  |
|                                        |                        |                  | <i>n</i> = 268                 | <i>n</i> = 240                 | <i>n</i> = 180                |
| Including infant birthweight in models | Attention Problems     | 1st Trimester    | 0.003 (-0.013, 0.018)          | 0.001 (-0.013, 0.016)          | -0.005 (-0.021, 0.011)        |
|                                        |                        | 2nd Trimester    | ** <b>0.009 (0.002, 0.016)</b> | ** <b>0.008 (0.002, 0.015)</b> | 0.001 (-0.006, 0.007)         |
|                                        |                        | 3rd Trimester    | 0.008 (-0.008, 0.023)          | 0.005 (-0.009, 0.019)          | 0.014 (-0.005, 0.032)         |
|                                        |                        | Entire Pregnancy | * <b>0.005 (0.0002, 0.009)</b> | * <b>0.004 (0.0003, 0.008)</b> | 0.001 (-0.004, 0.006)         |
|                                        | ADHD Problems          | 1st Trimester    | 0.005 (-0.016, 0.026)          | 0.001 (-0.019, 0.020)          | # -0.026 (-0.054, 0.003)      |
|                                        |                        | 2nd Trimester    | * <b>0.011 (0.002, 0.021)</b>  | ** <b>0.013 (0.003, 0.022)</b> | 0.008 (-0.002, 0.018)         |
|                                        |                        | 3rd Trimester    | 0.005 (-0.016, 0.026)          | 0.004 (-0.016, 0.025)          | 0.003 (-0.025, 0.031)         |
|                                        |                        | Entire Pregnancy | 0.005 (-0.001, 0.011)          | # 0.006 (-0.00001, 0.011)      | 0.003 (-0.005, 0.011)         |
|                                        | Internalizing Problems | 1st Trimester    | 0.015 (-0.026, 0.057)          | -0.020 (-0.054, 0.014)         | -0.028 (-0.08, 0.024)         |
|                                        |                        | 2nd Trimester    | 0.015 (-0.008, 0.038)          | # 0.015 (-0.002, 0.031)        | * <b>0.024 (0.003, 0.046)</b> |
|                                        |                        | 3rd Trimester    | -0.024 (-0.066, 0.018)         | 0.010 (-0.025, 0.045)          | -0.009 (-0.070, 0.052)        |
|                                        |                        | Entire Pregnancy | 0.003 (-0.011, 0.017)          | 0.004 (-0.006, 0.014)          | 0.011 (-0.006, 0.027)         |
|                                        | Externalizing Problems | 1st Trimester    | -0.016 (-0.075, 0.042)         | -0.019 (-0.078, 0.041)         | -0.053 (-0.132, 0.027)        |
|                                        |                        | 2nd Trimester    | * <b>0.027 (0.001, 0.054)</b>  | # 0.024 (-0.002, 0.049)        | * <b>0.029 (0.001, 0.056)</b> |
|                                        |                        | 3rd Trimester    | 0.017 (-0.042, 0.076)          | 0.029 (-0.027, 0.085)          | 0.009 (-0.069, 0.087)         |
|                                        |                        | Entire Pregnancy | 0.009 (-0.007, 0.026)          | 0.010 (-0.006, 0.026)          | 0.015 (-0.007, 0.036)         |
|                                        | Total Problems Score   | 1st Trimester    | -0.045 (-0.195, 0.106)         | -0.022 (-0.147, 0.104)         | -0.089 (-0.282, 0.104)        |
|                                        |                        | 2nd Trimester    | # 0.071 (-0.011, 0.154)        | ** <b>0.081 (0.028, 0.135)</b> | * <b>0.077 (0.011, 0.143)</b> |
|                                        |                        | 3rd Trimester    | -0.035 (-0.185, 0.116)         | 0.099 (-0.020, 0.217)          | -0.0003 (-0.188, 0.187)       |
|                                        |                        | Entire Pregnancy | 0.012 (-0.039, 0.063)          | * <b>0.039 (0.006, 0.073)</b>  | 0.043 (-0.010, 0.096)         |



**Supplemental Table S6 (cont.).** Results of sensitivity analyses using multivariable linear regression analyses of the relation ( $\beta$  estimate and 95% confidence interval) of prenatal acetaminophen exposure and CBCL outcomes at 26.5-28.5, 36-38, and 46-48 months.<sup>1</sup>

| Sensitivity Analysis                         | Outcome                | Exposure         | CBCL completed at              | CBCL completed at              | CBCL completed at             |
|----------------------------------------------|------------------------|------------------|--------------------------------|--------------------------------|-------------------------------|
|                                              |                        |                  | 26.5-28.5 months               | 36-38 months                   | 46-48 months                  |
|                                              |                        |                  | <i>n</i> = 268                 | <i>n</i> = 240                 | <i>n</i> = 180                |
| Including maternal verbal IQ (VIQ) in models | Attention Problems     | 1st Trimester    | 0.007 (-0.005, 0.018)          | # 0.009 (-0.0003, 0.018)       | 0.002 (-0.008, 0.012)         |
|                                              |                        | 2nd Trimester    | ** <b>0.009 (0.003, 0.015)</b> | ** <b>0.009 (0.004, 0.014)</b> | 0.003 (-0.003, 0.009)         |
|                                              |                        | 3rd Trimester    | 0.011 (-0.005, 0.028)          | 0.004 (-0.009, 0.016)          | 0.015 (-0.003, 0.032)         |
|                                              |                        | Entire Pregnancy | * <b>0.005 (0.001, 0.008)</b>  | ** <b>0.005 (0.002, 0.008)</b> | 0.002 (-0.001, 0.006)         |
|                                              | ADHD Problems          | 1st Trimester    | 0.003 (-0.012, 0.018)          | 0.009 (-0.005, 0.024)          | -0.008 (-0.023, 0.007)        |
|                                              |                        | 2nd Trimester    | * <b>0.010 (0.002, 0.018)</b>  | ** <b>0.014 (0.006, 0.021)</b> | 0.006 (-0.002, 0.015)         |
|                                              |                        | 3rd Trimester    | 0.013 (-0.008, 0.035)          | 0.002 (-0.018, 0.022)          | 0.008 (-0.019, 0.035)         |
|                                              |                        | Entire Pregnancy | # 0.004 (-0.0004, 0.009)       | ** <b>0.007 (0.002, 0.011)</b> | 0.002 (-0.004, 0.008)         |
|                                              | Internalizing Problems | 1st Trimester    | 0.005 (-0.021, 0.031)          | -0.011 (-0.037, 0.015)         | -0.022 (-0.053, 0.008)        |
|                                              |                        | 2nd Trimester    | 0.007 (-0.011, 0.024)          | 0.009 (-0.005, 0.023)          | # 0.015 (-0.002, 0.033)       |
|                                              |                        | 3rd Trimester    | -0.030 (-0.073, 0.013)         | 0.008 (-0.027, 0.043)          | -0.001 (-0.058, 0.056)        |
|                                              |                        | Entire Pregnancy | 0.001 (-0.009, 0.011)          | 0.003 (-0.006, 0.011)          | 0.003 (-0.009, 0.015)         |
|                                              | Externalizing Problems | 1st Trimester    | 0.005 (-0.037, 0.047)          | 0.010 (-0.030, 0.051)          | -0.017 (-0.059, 0.026)        |
|                                              |                        | 2nd Trimester    | * <b>0.025 (0.003, 0.047)</b>  | * <b>0.028 (0.006, 0.050)</b>  | * <b>0.025 (0.002, 0.049)</b> |
|                                              |                        | 3rd Trimester    | 0.029 (-0.03, 0.087)           | 0.023 (-0.033, 0.079)          | 0.022 (-0.053, 0.096)         |
|                                              |                        | Entire Pregnancy | 0.011 (-0.003, 0.024)          | # 0.013 (-0.001, 0.026)        | 0.011 (-0.005, 0.027)         |
|                                              | Total Problems Score   | 1st Trimester    | 0.007 (-0.087, 0.101)          | 0.017 (-0.067, 0.101)          | -0.042 (-0.141, 0.057)        |
|                                              |                        | 2nd Trimester    | 0.047 (-0.015, 0.110)          | ** <b>0.072 (0.027, 0.118)</b> | * <b>0.064 (0.008, 0.119)</b> |
|                                              |                        | 3rd Trimester    | -0.038 (-0.191, 0.115)         | 0.090 (-0.026, 0.207)          | 0.026 (-0.156, 0.208)         |
|                                              |                        | Entire Pregnancy | 0.014 (-0.022, 0.050)          | * <b>0.035 (0.007, 0.062)</b>  | 0.024 (-0.013, 0.062)         |

**Supplemental Table S6 (cont.).** Results of sensitivity analyses using multivariable linear regression analyses of the relation ( $\beta$  estimate and 95% confidence interval) of prenatal acetaminophen exposure and CBCL outcomes at 26.5-28.5, 36-38, and 46-48 months.<sup>1</sup>

| Sensitivity Analysis                          | Outcome                | Exposure         | CBCL completed at              | CBCL completed at              | CBCL completed at       |
|-----------------------------------------------|------------------------|------------------|--------------------------------|--------------------------------|-------------------------|
|                                               |                        |                  | 26.5-28.5 months               | 36-38 months                   | 46-48 months            |
|                                               |                        |                  | <i>n</i> = 268                 | <i>n</i> = 240                 | <i>n</i> = 180          |
| Including acetaminophen formulation in models | Attention Problems     | 1st Trimester    | 0.007 (-0.003, 0.017)          | 0.005 (-0.004, 0.014)          | 0.004 (-0.006, 0.013)   |
|                                               |                        | 2nd Trimester    | ** <b>0.008 (0.002, 0.014)</b> | ** <b>0.008 (0.003, 0.013)</b> | 0.003 (-0.003, 0.008)   |
|                                               |                        | 3rd Trimester    | # 0.015 (-0.001, 0.030)        | 0.004 (-0.010, 0.017)          | 0.014 (-0.003, 0.032)   |
|                                               |                        | Entire Pregnancy | * <b>0.004 (0.001, 0.008)</b>  | ** <b>0.004 (0.001, 0.007)</b> | 0.003 (-0.001, 0.006)   |
|                                               | ADHD Problems          | 1st Trimester    | 0.004 (-0.010, 0.018)          | 0.004 (-0.009, 0.017)          | -0.006 (-0.021, 0.010)  |
|                                               |                        | 2nd Trimester    | * <b>0.010 (0.001, 0.018)</b>  | ** <b>0.011 (0.003, 0.019)</b> | 0.007 (-0.002, 0.016)   |
|                                               |                        | 3rd Trimester    | 0.015 (-0.007, 0.037)          | 0.003 (-0.018, 0.023)          | 0.008 (-0.019, 0.035)   |
|                                               |                        | Entire Pregnancy | # 0.005 (-0.0005, 0.01)        | * <b>0.006 (0.001, 0.010)</b>  | 0.003 (-0.003, 0.009)   |
|                                               | Internalizing Problems | 1st Trimester    | 0.004 (-0.019, 0.028)          | # -0.022 (-0.045, 0.001)       | -0.025 (-0.055, 0.005)  |
|                                               |                        | 2nd Trimester    | 0.006 (-0.011, 0.024)          | 0.007 (-0.008, 0.022)          | 0.011 (-0.008, 0.030)   |
|                                               |                        | 3rd Trimester    | -0.02 (-0.062, 0.023)          | 0.010 (-0.025, 0.046)          | -0.004 (-0.063, 0.056)  |
|                                               |                        | Entire Pregnancy | 0.002 (-0.007, 0.012)          | -0.000005 (-0.009, 0.009)      | 0.0003 (-0.012, 0.013)  |
|                                               | Externalizing Problems | 1st Trimester    | 0.001 (-0.037, 0.039)          | -0.003 (-0.041, 0.035)         | -0.011 (-0.053, 0.031)  |
|                                               |                        | 2nd Trimester    | # 0.021 (-0.002, 0.044)        | # 0.020 (-0.002, 0.043)        | 0.018 (-0.007, 0.042)   |
|                                               |                        | 3rd Trimester    | 0.031 (-0.029, 0.091)          | 0.020 (-0.037, 0.077)          | 0.011 (-0.063, 0.085)   |
|                                               |                        | Entire Pregnancy | 0.010 (-0.004, 0.023)          | 0.010 (-0.003, 0.023)          | 0.009 (-0.007, 0.025)   |
|                                               | Total Problems Score   | 1st Trimester    | 0.001 (-0.087, 0.088)          | -0.021 (-0.102, 0.061)         | -0.027 (-0.127, 0.073)  |
|                                               |                        | 2nd Trimester    | 0.038 (-0.027, 0.103)          | * <b>0.062 (0.014, 0.111)</b>  | # 0.053 (-0.005, 0.112) |
|                                               |                        | 3rd Trimester    | 0.038 (-0.027, 0.103)          | 0.089 (-0.033, 0.210)          | 0.012 (-0.174, 0.199)   |
|                                               |                        | Entire Pregnancy | 0.013 (-0.023, 0.050)          | # 0.028 (-0.0004, 0.057)       | 0.024 (-0.015, 0.063)   |

**Supplemental Table S6 (cont.).** Results of sensitivity analyses using multivariable linear regression analyses of the relation ( $\beta$  estimate and 95% confidence interval) of prenatal acetaminophen exposure and CBCL outcomes at 26.5-28.5, 36-38, and 46-48 months.<sup>1</sup>

| Sensitivity Analysis                           | Outcome                | Exposure         | CBCL completed at              | CBCL completed at              | CBCL completed at             |
|------------------------------------------------|------------------------|------------------|--------------------------------|--------------------------------|-------------------------------|
|                                                |                        |                  | 26.5-28.5 months               | 36-38 months                   | 46-48 months                  |
|                                                |                        |                  | <i>n</i> = 268                 | <i>n</i> = 240                 | <i>n</i> = 180                |
| Excluding gestational age at birth from models | Attention Problems     | 1st Trimester    | 0.007 (-0.003, 0.017)          | 0.005 (-0.004, 0.014)          | 0.003 (-0.007, 0.012)         |
|                                                |                        | 2nd Trimester    | ** <b>0.009 (0.003, 0.015)</b> | ** <b>0.008 (0.003, 0.013)</b> | 0.003 (-0.003, 0.008)         |
|                                                |                        | 3rd Trimester    | 0.009 (-0.006, 0.025)          | 0.004 (-0.009, 0.017)          | # 0.014 (-0.003, 0.031)       |
|                                                |                        | Entire Pregnancy | * <b>0.004 (0.001, 0.008)</b>  | ** <b>0.004 (0.001, 0.007)</b> | 0.002 (-0.001, 0.006)         |
|                                                | ADHD Problems          | 1st Trimester    | 0.004 (-0.010, 0.018)          | 0.004 (-0.009, 0.017)          | -0.007 (-0.023, 0.008)        |
|                                                |                        | 2nd Trimester    | * <b>0.011 (0.002, 0.019)</b>  | ** <b>0.013 (0.005, 0.020)</b> | 0.007 (-0.002, 0.015)         |
|                                                |                        | 3rd Trimester    | 0.011 (-0.010, 0.033)          | 0.003 (-0.017, 0.023)          | 0.009 (-0.017, 0.036)         |
|                                                |                        | Entire Pregnancy | # 0.004 (-0.001, 0.009)        | * <b>0.006 (0.001, 0.010)</b>  | 0.002 (-0.003, 0.008)         |
|                                                | Internalizing Problems | 1st Trimester    | 0.005 (-0.018, 0.029)          | # -0.002 (-0.044, 0.003)       | -0.024 (-0.054, 0.006)        |
|                                                |                        | 2nd Trimester    | 0.009 (-0.008, 0.025)          | 0.009 (-0.005, 0.023)          | 0.014 (-0.004, 0.032)         |
|                                                |                        | 3rd Trimester    | -0.024 (-0.064, 0.016)         | 0.007 (-0.028, 0.042)          | -0.005 (-0.063, 0.053)        |
|                                                |                        | Entire Pregnancy | 0.001 (-0.008, 0.011)          | 0.001 (-0.007, 0.009)          | 0.002 (-0.010, 0.014)         |
|                                                | Externalizing Problems | 1st Trimester    | 0.002 (-0.035, 0.040)          | -0.0001 (-0.038, 0.038)        | -0.013 (-0.055, 0.029)        |
|                                                |                        | 2nd Trimester    | * <b>0.026 (0.004, 0.048)</b>  | * <b>0.025 (0.003, 0.047)</b>  | * <b>0.025 (0.002, 0.048)</b> |
|                                                |                        | 3rd Trimester    | 0.023 (-0.035, 0.081)          | 0.025 (-0.031, 0.081)          | 0.022 (-0.051, 0.096)         |
|                                                |                        | Entire Pregnancy | 0.009 (-0.004, 0.022)          | 0.011 (-0.002, 0.024)          | 0.011 (-0.004, 0.027)         |
|                                                | Total Problems Score   | 1st Trimester    | 0.006 (-0.081, 0.093)          | -0.015 (-0.096, 0.066)         | -0.031 (-0.130, 0.069)        |
|                                                |                        | 2nd Trimester    | # 0.053 (-0.007, 0.114)        | ** <b>0.065 (0.019, 0.112)</b> | * <b>0.065 (0.011, 0.120)</b> |
|                                                |                        | 3rd Trimester    | -0.035 (-0.183, 0.113)         | 0.091 (-0.028, 0.210)          | 0.020 (-0.161, 0.200)         |
|                                                |                        | Entire Pregnancy | 0.012 (-0.023, 0.047)          | * <b>0.029 (0.001, 0.057)</b>  | 0.028 (-0.010, 0.065)         |

**Supplemental Table S6 (cont.).** Results of sensitivity analyses using multivariable linear regression analyses of the relation ( $\beta$  estimate and 95% confidence interval) of prenatal acetaminophen exposure and CBCL outcomes at 26.5-28.5, 36-38, and 46-48 months.<sup>1</sup>

| Sensitivity Analysis                                                  | Outcome                | Exposure         | CBCL completed at       | CBCL completed at              | CBCL completed at             |
|-----------------------------------------------------------------------|------------------------|------------------|-------------------------|--------------------------------|-------------------------------|
|                                                                       |                        |                  | 26.5-28.5 months        | 36-38 months                   | 46-48 months                  |
|                                                                       |                        |                  | <i>n</i> = 268          | <i>n</i> = 240                 | <i>n</i> = 180                |
| Only including children with data at all three ages ( <i>n</i> = 149) | Attention Problems     | 1st Trimester    | 0.006 (-0.006, 0.018)   | 0.004 (-0.006, 0.015)          | 0.005 (-0.004, 0.015)         |
|                                                                       |                        | 2nd Trimester    | 0.006 (-0.002, 0.015)   | ** <b>0.010 (0.003, 0.017)</b> | * <b>0.008 (0.001, 0.015)</b> |
|                                                                       |                        | 3rd Trimester    | 0.001 (-0.021, 0.024)   | 0.011 (-0.008, 0.030)          | 0.013 (-0.005, 0.032)         |
|                                                                       |                        | Entire Pregnancy | 0.003 (-0.002, 0.008)   | * <b>0.004 (0.0004, 0.008)</b> | # 0.004 (-0.0002, 0.008)      |
|                                                                       | ADHD Problems          | 1st Trimester    | 0.002 (-0.014, 0.018)   | 0.0004 (-0.015, 0.016)         | -0.004 (-0.021, 0.013)        |
|                                                                       |                        | 2nd Trimester    | 0.006 (-0.005, 0.017)   | # 0.009 (-0.002, 0.020)        | 0.008 (-0.003, 0.019)         |
|                                                                       |                        | 3rd Trimester    | -0.006 (-0.036, 0.023)  | -0.003 (-0.033, 0.026)         | 0.00003 (-0.030, 0.030)       |
|                                                                       |                        | Entire Pregnancy | 0.002 (-0.004, 0.008)   | 0.003 (-0.003, 0.009)          | 0.002 (-0.005, 0.008)         |
|                                                                       | Internalizing Problems | 1st Trimester    | -0.006 (-0.034, 0.023)  | -0.023 (-0.052, 0.005)         | -0.022 (-0.054, 0.009)        |
|                                                                       |                        | 2nd Trimester    | 0.004 (-0.015, 0.023)   | 0.002 (-0.018, 0.022)          | 0.007 (-0.016, 0.031)         |
|                                                                       |                        | 3rd Trimester    | -0.025 (-0.074, 0.025)  | 0.008 (-0.046, 0.062)          | -0.01 (-0.072, 0.051)         |
|                                                                       |                        | Entire Pregnancy | -0.0004 (-0.011, 0.010) | -0.003 (-0.015, 0.008)         | -0.004 (-0.017, 0.010)        |
|                                                                       | Externalizing Problems | 1st Trimester    | 0.00003 (-0.045, 0.045) | 0.003 (-0.042, 0.048)          | 0.003 (-0.043, 0.049)         |
|                                                                       |                        | 2nd Trimester    | 0.021 (-0.010, 0.052)   | 0.021 (-0.008, 0.051)          | * <b>0.033 (0.003, 0.064)</b> |
|                                                                       |                        | 3rd Trimester    | 0.017 (-0.067, 0.102)   | 0.031 (-0.050, 0.111)          | 0.025 (-0.057, 0.107)         |
|                                                                       |                        | Entire Pregnancy | 0.009 (-0.009, 0.027)   | 0.009 (-0.008, 0.026)          | 0.014 (-0.003, 0.032)         |
|                                                                       | Total Problems Score   | 1st Trimester    | -0.014 (-0.118, 0.089)  | -0.022 (-0.117, 0.073)         | -0.006 (-0.113, 0.100)        |
|                                                                       |                        | 2nd Trimester    | 0.034 (-0.033, 0.101)   | 0.046 (-0.017, 0.110)          | 0.060 (-0.013, 0.133)         |
|                                                                       |                        | 3rd Trimester    | -0.001 (-0.182, 0.180)  | 0.101 (-0.069, 0.271)          | 0.022 (-0.172, 0.216)         |
|                                                                       |                        | Entire Pregnancy | 0.013 (-0.026, 0.052)   | 0.019 (-0.017, 0.056)          | 0.020 (-0.022, 0.062)         |

**Supplemental Table S6 (cont.).** Results of sensitivity analyses using multivariable linear regression analyses of the relation ( $\beta$  estimate and 95% confidence interval) of prenatal acetaminophen exposure and CBCL outcomes at 26.5-28.5, 36-38, and 46-48 months.<sup>1</sup>

| Sensitivity Analysis                                                                             | Outcome                | Exposure         | CBCL completed at              | CBCL completed at                 | CBCL completed at             |
|--------------------------------------------------------------------------------------------------|------------------------|------------------|--------------------------------|-----------------------------------|-------------------------------|
|                                                                                                  |                        |                  | 26.5-28.5 months               | 36-38 months                      | 46-48 months                  |
|                                                                                                  |                        |                  | <i>n</i> = 268                 | <i>n</i> = 240                    | <i>n</i> = 180                |
| Excluding children whose mothers reported smoking cigarettes during pregnancy ( <i>n</i> = 7-11) | Attention Problems     | 1st Trimester    | 0.007 (-0.004, 0.017)          | 0.005 (-0.003, 0.014)             | 0.003 (-0.006, 0.013)         |
|                                                                                                  |                        | 2nd Trimester    | ** <b>0.010 (0.004, 0.015)</b> | ** <b>0.009 (0.004, 0.014)</b>    | 0.003 (-0.002, 0.009)         |
|                                                                                                  |                        | 3rd Trimester    | 0.010 (-0.005, 0.026)          | 0.005 (-0.009, 0.018)             | 0.013 (-0.004, 0.030)         |
|                                                                                                  |                        | Entire Pregnancy | * <b>0.004 (0.001, 0.008)</b>  | ** <b>0.004 (0.001, 0.008)</b>    | 0.003 (-0.001, 0.006)         |
|                                                                                                  | ADHD Problems          | 1st Trimester    | 0.004 (-0.010, 0.018)          | 0.004 (-0.009, 0.017)             | -0.007 (-0.022, 0.008)        |
|                                                                                                  |                        | 2nd Trimester    | * <b>0.011 (0.002, 0.019)</b>  | ** <b>0.013 (0.005, 0.021)</b>    | 0.007 (-0.002, 0.015)         |
|                                                                                                  |                        | 3rd Trimester    | 0.013 (-0.009, 0.035)          | 0.004 (-0.016, 0.024)             | 0.006 (-0.020, 0.033)         |
|                                                                                                  |                        | Entire Pregnancy | # 0.004 (-0.001, 0.009)        | * <b>0.006 (0.001, 0.010)</b>     | 0.003 (-0.003, 0.008)         |
|                                                                                                  | Internalizing Problems | 1st Trimester    | 0.004 (-0.019, 0.028)          | * <b>-0.023 (-0.046, -0.0002)</b> | -0.025 (-0.055, 0.005)        |
|                                                                                                  |                        | 2nd Trimester    | 0.008 (-0.009, 0.025)          | 0.007 (-0.007, 0.021)             | 0.014 (-0.004, 0.031)         |
|                                                                                                  |                        | 3rd Trimester    | -0.021 (-0.062, 0.019)         | 0.005 (-0.030, 0.040)             | -0.008 (-0.066, 0.050)        |
|                                                                                                  |                        | Entire Pregnancy | 0.001 (-0.008, 0.011)          | -0.00001 (-0.008, 0.008)          | 0.002 (-0.010, 0.014)         |
|                                                                                                  | Externalizing Problems | 1st Trimester    | 0.003 (-0.036, 0.041)          | -0.002 (-0.041, 0.036)            | -0.012 (-0.055, 0.030)        |
|                                                                                                  |                        | 2nd Trimester    | * <b>0.026 (0.004, 0.049)</b>  | * <b>0.025 (0.003, 0.048)</b>     | * <b>0.024 (0.001, 0.048)</b> |
|                                                                                                  |                        | 3rd Trimester    | 0.026 (-0.032, 0.085)          | 0.027 (-0.030, 0.084)             | 0.015 (-0.059, 0.089)         |
|                                                                                                  |                        | Entire Pregnancy | 0.009 (-0.004, 0.023)          | 0.011 (-0.002, 0.024)             | 0.011 (-0.004, 0.027)         |
|                                                                                                  | Total Problems Score   | 1st Trimester    | 0.003 (-0.085, 0.09)           | -0.021 (-0.103, 0.061)            | -0.028 (-0.128, 0.072)        |
|                                                                                                  |                        | 2nd Trimester    | 0.050 (-0.011, 0.112)          | ** <b>0.065 (0.018, 0.112)</b>    | * <b>0.065 (0.010, 0.120)</b> |
|                                                                                                  |                        | 3rd Trimester    | -0.024 (-0.174, 0.125)         | 0.093 (-0.028, 0.214)             | 0.012 (-0.170, 0.194)         |
|                                                                                                  |                        | Entire Pregnancy | 0.010 (-0.025, 0.046)          | # 0.028 (-0.0003, 0.056)          | 0.029 (-0.009, 0.067)         |

**Supplemental Table S6 (cont.).** Results of sensitivity analyses using multivariable linear regression analyses of the relation ( $\beta$  estimate and 95% confidence interval) of prenatal acetaminophen exposure and CBCL outcomes at 26.5-28.5, 36-38, and 46-48 months.<sup>1</sup>

| Sensitivity Analysis                                                                       | Outcome                | Exposure         | CBCL completed at             | CBCL completed at                  | CBCL completed at              |
|--------------------------------------------------------------------------------------------|------------------------|------------------|-------------------------------|------------------------------------|--------------------------------|
|                                                                                            |                        |                  | 26.5-28.5 months              | 36-38 months                       | 46-48 months                   |
|                                                                                            |                        |                  | <i>n</i> = 268                | <i>n</i> = 240                     | <i>n</i> = 180                 |
| Excluding children whose mothers reported ever being diagnosed with ADHD ( <i>n</i> = 5-8) | Attention Problems     | 1st Trimester    | 0.005 (-0.005, 0.015)         | 0.005 (-0.004, 0.014)              | 0.005 (-0.005, 0.014)          |
|                                                                                            |                        | 2nd Trimester    | * <b>0.009 (0.001, 0.016)</b> | ** <b>0.011 (0.005, 0.017)</b>     | 0.004 (-0.001, 0.009)          |
|                                                                                            |                        | 3rd Trimester    | 0.002 (-0.016, 0.019)         | 0.00001 (-0.015, 0.015)            | # 0.016 (-0.001, 0.032)        |
|                                                                                            |                        | Entire Pregnancy | # 0.004 (-0.001, 0.008)       | * <b>0.005 (0.001, 0.008)</b>      | # 0.003 (-0.0002, 0.007)       |
|                                                                                            | ADHD Problems          | 1st Trimester    | 0.002 (-0.012, 0.016)         | 0.003 (-0.010, 0.016)              | -0.004 (-0.019, 0.011)         |
|                                                                                            |                        | 2nd Trimester    | # 0.009 (-0.001, 0.019)       | * <b>0.013 (0.003, 0.022)</b>      | * <b>0.008 (0.0001, 0.017)</b> |
|                                                                                            |                        | 3rd Trimester    | 0.003 (-0.022, 0.028)         | -0.008 (-0.030, 0.015)             | 0.011 (-0.015, 0.038)          |
|                                                                                            |                        | Entire Pregnancy | 0.002 (-0.003, 0.008)         | # 0.005 (-0.001, 0.010)            | 0.004 (-0.002, 0.009)          |
|                                                                                            | Internalizing Problems | 1st Trimester    | 0.006 (-0.018, 0.029)         | * <b>-0.0236 (-0.047, -0.0003)</b> | -0.018 (-0.048, 0.011)         |
|                                                                                            |                        | 2nd Trimester    | 0.008 (-0.008, 0.025)         | -0.0002 (-0.018, 0.017)            | # 0.017 (-0.0002, 0.035)       |
|                                                                                            |                        | 3rd Trimester    | -0.021 (-0.061, 0.020)        | -0.008 (-0.049, 0.032)             | 0.001 (-0.057, 0.058)          |
|                                                                                            |                        | Entire Pregnancy | 0.002 (-0.008, 0.011)         | -0.005 (-0.015, 0.005)             | 0.004 (-0.007, 0.016)          |
|                                                                                            | Externalizing Problems | 1st Trimester    | -0.001 (-0.038, 0.037)        | -0.004 (-0.043, 0.034)             | -0.004 (-0.046, 0.039)         |
|                                                                                            |                        | 2nd Trimester    | # 0.027 (-0.001, 0.054)       | # 0.024 (-0.004, 0.051)            | * <b>0.030 (0.007, 0.053)</b>  |
|                                                                                            |                        | 3rd Trimester    | 0.008 (-0.059, 0.075)         | 0.009 (-0.054, 0.073)              | 0.027 (-0.046, 0.101)          |
|                                                                                            |                        | Entire Pregnancy | 0.007 (-0.009, 0.022)         | 0.008 (-0.007, 0.024)              | # 0.015 (-0.0003, 0.031)       |
|                                                                                            | Total Problems Score   | 1st Trimester    | 0.005 (-0.082, 0.091)         | -0.025 (-0.107, 0.056)             | -0.006 (-0.105, 0.094)         |
|                                                                                            |                        | 2nd Trimester    | 0.050 (-0.010, 0.111)         | # 0.055 (-0.003, 0.113)            | ** <b>0.077 (0.023, 0.131)</b> |
|                                                                                            |                        | 3rd Trimester    | -0.021 (-0.167, 0.126)        | 0.051 (-0.084, 0.186)              | 0.039 (-0.141, 0.218)          |
|                                                                                            |                        | Entire Pregnancy | 0.013 (-0.022, 0.047)         | 0.019 (-0.014, 0.052)              | * <b>0.038 (0.001, 0.075)</b>  |

**Supplemental Table S6 (cont.).** Results of sensitivity analyses using multivariable linear regression analyses of the relation ( $\beta$  estimate and 95% confidence interval) of prenatal acetaminophen exposure and CBCL outcomes at 26.5-28.5, 36-38, and 46-48 months.<sup>1</sup>

| Sensitivity Analysis                                             | Outcome                | Exposure              | CBCL completed at              | CBCL completed at              | CBCL completed at              |
|------------------------------------------------------------------|------------------------|-----------------------|--------------------------------|--------------------------------|--------------------------------|
|                                                                  |                        |                       | 26.5-28.5 months               | 36-38 months                   | 46-48 months                   |
|                                                                  |                        |                       | <i>n</i> = 268                 | <i>n</i> = 240                 | <i>n</i> = 180                 |
| Excluding leverage points (Cook's D > 0.06)<br>( <i>n</i> = 0-7) | Attention Problems     | 1st Trimester         | # 0.008 (-0.001, 0.018)        | 0.002 (-0.011, 0.015)          | -0.003 (-0.017, 0.010)         |
|                                                                  |                        | 2nd Trimester         | ** <b>0.009 (0.003, 0.014)</b> | ** <b>0.009 (0.004, 0.014)</b> | * <b>0.008 (0.002, 0.014)</b>  |
|                                                                  |                        | 3rd Trimester         | 0.001 (-0.021, 0.023)          | 0.004 (-0.009, 0.016)          | 0.001 (-0.018, 0.020)          |
|                                                                  |                        | Entire Pregnancy      | * <b>0.004 (0.0005, 0.007)</b> | ** <b>0.004 (0.001, 0.007)</b> | # 0.003 (-0.0003, 0.006)       |
|                                                                  | ADHD Problems          | 1st Trimester         | 0.004 (-0.010, 0.018)          | -0.001 (-0.014, 0.013)         | -0.020 (-0.046, 0.006)         |
|                                                                  |                        | 2nd Trimester         | * <b>0.010 (0.002, 0.019)</b>  | ** <b>0.013 (0.005, 0.020)</b> | 0.006 (-0.002, 0.014)          |
|                                                                  |                        | 3rd Trimester         | 0.007 (-0.019, 0.032)          | -0.005 (-0.028, 0.019)         | 0.002 (-0.024, 0.028)          |
|                                                                  |                        | Entire Pregnancy      | # 0.004 (-0.001, 0.009)        | * <b>0.006 (0.001, 0.010)</b>  | 0.002 (-0.003, 0.008)          |
|                                                                  | Internalizing Problems | 1st Trimester         | 0.004 (-0.019, 0.028)          | # -0.022 (-0.045, 0.001)       | -0.017 (-0.043, 0.008)         |
|                                                                  |                        | 2nd Trimester         | 0.009 (-0.007, 0.025)          | 0.012 (-0.011, 0.034)          | 0.006 (-0.024, 0.035)          |
|                                                                  |                        | 3rd Trimester         | -0.016 (-0.056, 0.024)         | -0.006 (-0.044, 0.033)         | -0.012 (-0.063, 0.039)         |
|                                                                  |                        | Entire Pregnancy      | 0.001 (-0.008, 0.011)          | -0.002 (-0.015, 0.012)         | -0.007 (-0.023, 0.009)         |
|                                                                  | Externalizing Problems | 1st Trimester         | 0.005 (-0.032, 0.043)          | -0.022 (-0.082, 0.038)         | -0.029 (-0.098, 0.041)         |
|                                                                  |                        | 2nd Trimester         | * <b>0.026 (0.003, 0.048)</b>  | * <b>0.025 (0.003, 0.047)</b>  | ** <b>0.030 (0.008, 0.052)</b> |
|                                                                  |                        | 3rd Trimester         | 0.038 (-0.019, 0.095)          | 0.045 (-0.017, 0.107)          | 0.060 (-0.023, 0.142)          |
|                                                                  |                        | Entire Pregnancy      | 0.009 (-0.004, 0.022)          | 0.011 (-0.003, 0.024)          | * <b>0.020 (0.0002, 0.039)</b> |
| Total Problems Score                                             | 1st Trimester          | -0.017 (-0.16, 0.127) | -0.020 (-0.102, 0.061)         | -0.092 (-0.259, 0.076)         |                                |
|                                                                  | 2nd Trimester          | 0.049 (-0.012, 0.110) | ** <b>0.092 (0.039, 0.145)</b> | * <b>0.065 (0.003, 0.128)</b>  |                                |
|                                                                  | 3rd Trimester          | 0.011 (-0.136, 0.157) | 0.016 (-0.121, 0.153)          | 0.038 (-0.133, 0.208)          |                                |
|                                                                  | Entire Pregnancy       | 0.010 (-0.024, 0.045) | 0.034 (-0.011, 0.080)          | 0.033 (-0.016, 0.083)          |                                |

<sup>1</sup>All models were adjusted for child sex, age, and gestational age; maternal age, education, and parity; annual household income, reason for taking (indication), mean PSS score during pregnancy, mean EPDS score during pregnancy.

# *p* < 0.10, \**p* < 0.05, \*\**p* < 0.01

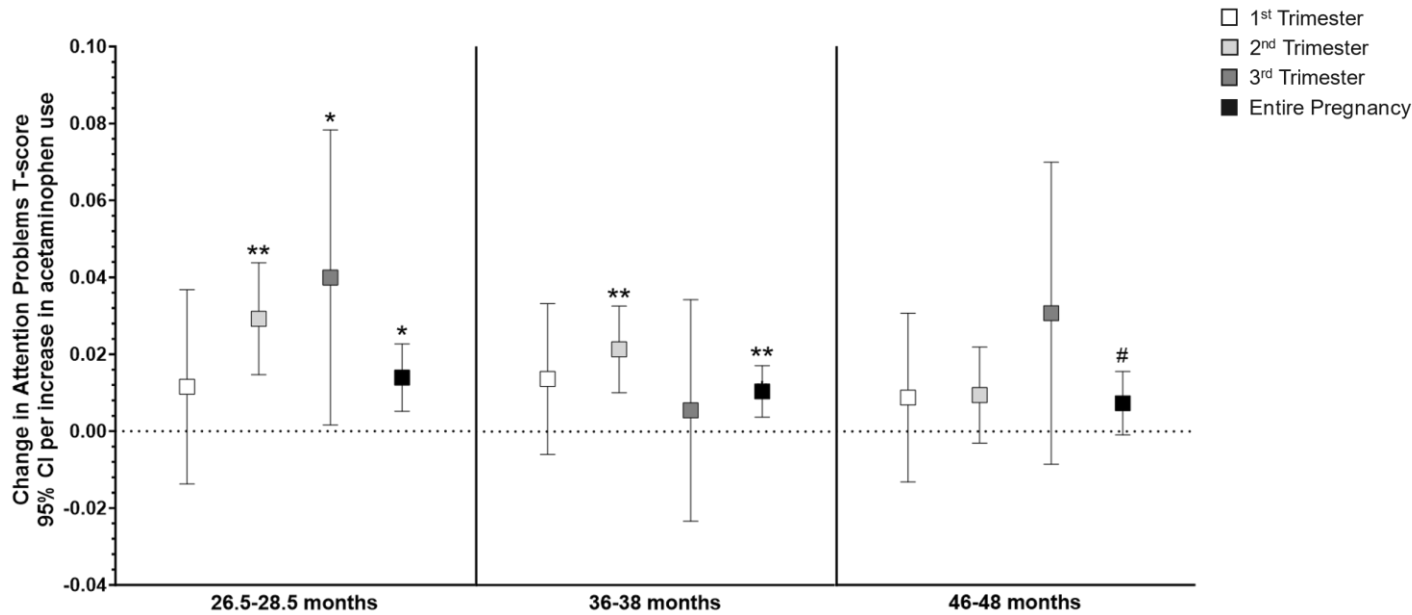

**Supplemental Figure S9.** Associations of acetaminophen use during pregnancy and Attention Problems T-scores on the CBCL at 26.5-28.5 (left panel), 36-38 (middle panel), and 46-48 months (right panel).<sup>a</sup> Higher acetaminophen exposure during the second ( $\beta = 0.029$ , 95% CI: 0.015, 0.044) and third trimesters ( $\beta = 0.040$ , 95% CI: 0.002, 0.078), and throughout pregnancy ( $\beta = 0.014$ , 95% CI: 0.0055, 0.022) were related to higher Attention Problems T-scores at 26.5-28.5 months. At 36-38 months, more acetaminophen use during the second trimester ( $\beta = 0.021$ , 95% CI: 0.010, 0.033) and throughout pregnancy ( $\beta = 0.010$ , 95% CI: 0.004, 0.030) were also associated with higher Attention Problems T-scores. Higher acetaminophen exposure throughout pregnancy was also related to higher Attention Problems T-scores at 46-48 months ( $\beta = 0.007$ , 95% CI: -0.001, 0.016).

<sup>a</sup>All models were adjusted for child gestational age, maternal age, maternal parity (nulliparous vs.  $\geq 1$ ), maternal education (< bachelor's degree vs.  $\geq$  bachelor's degree), mean perceived stress score during pregnancy, mean Edinburgh Postnatal Depression Scale score during pregnancy, and indication (N/A, pain, other, or multiple).

# $p < 0.10$ , \* $p < 0.05$ , \*\* $p < 0.01$



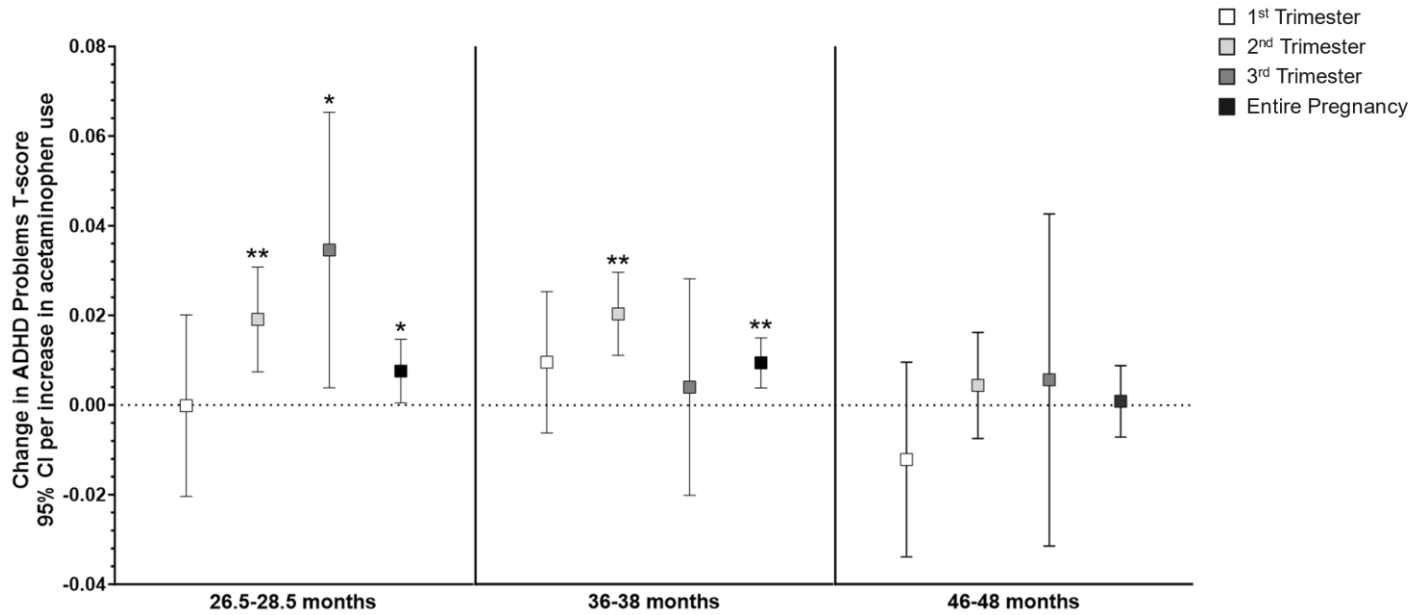

**Supplemental Figure S10.** Associations of acetaminophen use during pregnancy and ADHD Problems T-scores on the CBCL at 26.5-28.5 (left panel), 36-38 (middle panel), and 46-48 months (right panel).<sup>a</sup> More acetaminophen use during the second ( $\beta = 0.019$ , 95% CI: 0.007, 0.031) and third trimesters ( $\beta = 0.035$ , 95% CI: 0.004, 0.065), and throughout pregnancy ( $\beta = 0.008$ , 95% CI: 0.0005, 0.015) were associated with higher ADHD Problems T-scores at 26.5-28.5 months. More acetaminophen use during the second trimester ( $\beta = 0.020$ , 95% CI: 0.011, 0.030) and third trimesters ( $\beta = 0.009$ , 95% CI: 0.004, 0.015) were also associated with higher ADHD Problems T-scores at 36-38 months.

<sup>a</sup>All models were adjusted for child gestational age, maternal age, maternal parity (nulliparous vs.  $\geq 1$ ), maternal education (< bachelor's degree vs.  $\geq$  bachelor's degree), mean perceived stress score during pregnancy, mean Edinburgh Postnatal Depression Scale score during pregnancy, and indication (N/A, pain, other, or multiple).

\* $p < 0.05$ , \*\* $p < 0.01$

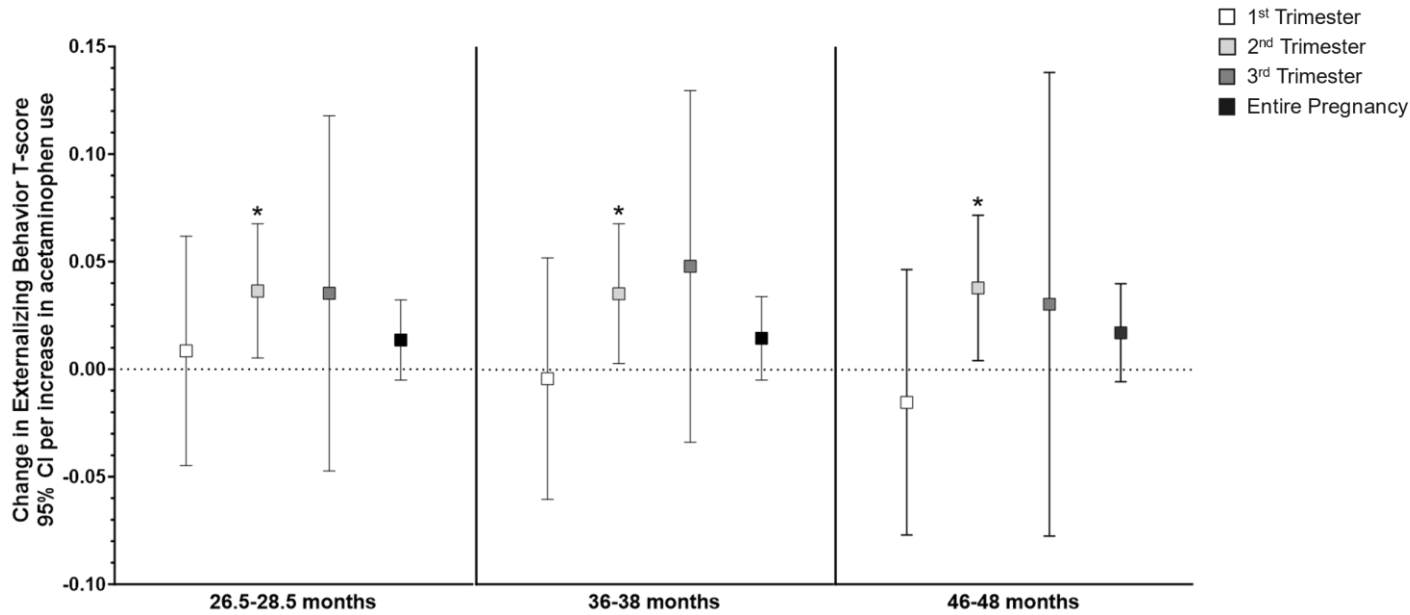

**Supplemental Figure S11.** Associations of acetaminophen use during pregnancy and Externalizing Behavior T-scores on the CBCL at 26.5-28.5 (left panel), 36-38 (middle panel), and 46-48 months (right panel).<sup>a</sup> More acetaminophen use during the second trimester was associated with higher Externalizing Behavior T-scores at 26.5-28.5 ( $\beta = 0.036$ , 95% CI: 0.005, 0.068), 36-38 ( $\beta = 0.035$ , 95% CI: 0.003, 0.068), and 46-48 months ( $\beta = 0.038$ , 95% CI: 0.004, 0.072).

<sup>a</sup>All models were adjusted for child gestational age, maternal age, maternal parity (nulliparous vs.  $\geq 1$ ), maternal education (< bachelor's degree vs.  $\geq$  bachelor's degree), mean perceived stress score during pregnancy, mean Edinburgh Postnatal Depression Scale score during pregnancy, and indication (N/A, pain, other, or multiple).

\* $p < 0.05$

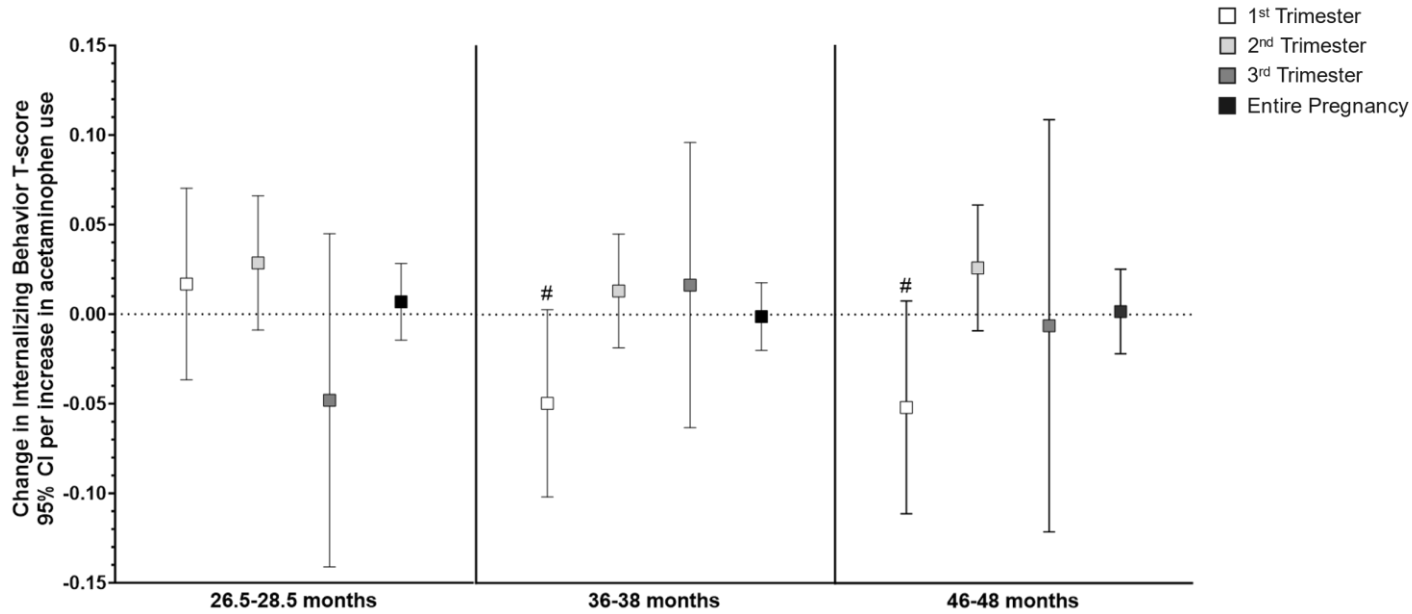

**Supplemental Figure S12.** Associations of acetaminophen use during pregnancy and Internalizing Behavior T-scores on the CBCL at 26.5-28.5 (left panel), 36-38 (middle panel), and 46-48 months (right panel).<sup>a</sup> Higher acetaminophen exposure during the first trimester was associated with lower Internalizing Behavior T-scores at 36-38 ( $\beta = -0.050$ , 95% CI: -0.102, 0.003) and 46-48 months ( $\beta = -0.052$ , 95% CI: -0.111, 0.008).

<sup>a</sup>All models were adjusted for child gestational age, maternal age, maternal parity (nulliparous vs.  $\geq 1$ ), maternal education (< bachelor's degree vs.  $\geq$  bachelor's degree), mean perceived stress score during pregnancy, mean Edinburgh Postnatal Depression Scale score during pregnancy, and indication (N/A, pain, other, or multiple).

<sup>#</sup> $p < 0.10$

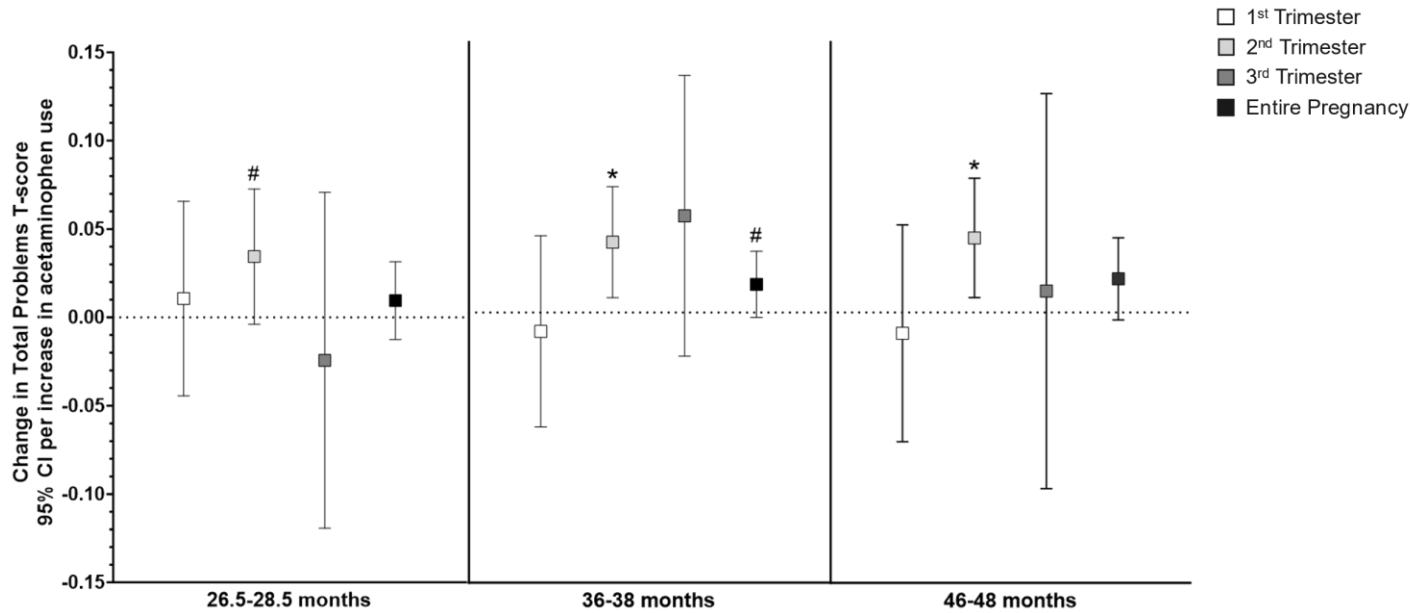

**Supplemental Figure S13.** Associations of acetaminophen use during pregnancy and Total Problems T-scores on the CBCL at 26.5-28.5 (left panel), 36-38 (middle panel), and 46-48 months (right panel).<sup>a</sup> Higher acetaminophen exposure during the second trimester was associated with higher Total Problems T-scores at 26.5-28.5 ( $\beta = 0.034$ , 95% CI: -0.004, 0.073), 36-38 ( $\beta = 0.039$ , 95% CI: 0.008, 0.070), and 46-48 months ( $\beta = 0.041$ , 95% CI: 0.008, 0.075). Higher acetaminophen exposure throughout pregnancy was also associated with higher Total Problems T-scores at 36-38 months ( $\beta = 0.016$ , 95% CI: -0.003, 0.034).

<sup>a</sup>All models were adjusted for child gestational age, maternal age, maternal parity (nulliparous vs.  $\geq 1$ ), maternal education (< bachelor's degree vs.  $\geq$  bachelor's degree), mean perceived stress score during pregnancy, mean Edinburgh Postnatal Depression Scale score during pregnancy, and indication (N/A, pain, other, or multiple).

# $p < 0.10$ , \* $p < 0.05$
